# Supplementary material for: Cysteine dioxygenase 1 is a metabolic liability for non-small cell lung cancer
Source: eLife. 2019 May 20;8:e45572. doi: 10.7554/eLife.45572 (PMC6584702; doi:10.7554/eLife.45572)
Supplement: Figure 1—figure supplement 1—source data 1. [file elife-45572-fig1-figsupp1-data1.xlsx]

## Sheet: Figure 1 S1A
	log2(Fold Change)	-log(P-value)
1-AMINOCYCLOPROPANE-1-CARBOXYLATE_neg	-0.35942	0.6464
1-AMINOCYCLOPROPANE-1-CARBOXYLATE_pos	0.051932	0.22395
10-HYDROXYDECANOATE_neg	-0.10905	0.25478
2-DEOXY-D-GLUCOSE_neg	0.65883	1.3561
2-DEOXY-D-GLUCOSE_pos	-0.15054	1.2093
2-HYDROXY-4-METHYLTHIOBUTYRIC ACID_neg	-0.5987	1.2998
2-HYDROXYBUTYRIC ACID_neg	-0.21488	1.1554
2-HYDROXYPHENYLACETIC ACID_neg	0.1663	0.76084
2-METHYLPROPANOATE_neg	-0.21885	1.2973
2-OXOADIPIC ACID_neg	-0.20079	0.35971
2-QUINOLINECARBOXYLIC ACID_neg	-0.080465	0.2451
2-QUINOLINECARBOXYLIC ACID_pos	-0.26247	0.58517
2,3-DIHYDROXYBENZOATE_neg	0.66175	1.5299
2,6-DIHYDROXYPYRIDINE_pos	0.54242	1.0631
2'-DEOXYGUANOSINE 5'-MONOPHOSPHATE_pos	0.11131	0.6975
3-2-HYDROXYPHENYLPROPANOATE_neg	0.090244	0.24525
3-4-HYDROXYPHENYLLACTATE_neg	-0.076329	0.48906
3-4-HYDROXYPHENYLPYRUVATE_neg	-0.22252	0.88119
3-AMINOISOBUTANOATE_neg	0.24456	0.62288
3-HYDROXY-3-METHYLGLUTARATE_neg	-0.078308	0.52725
3-HYDROXYPHENYLACETATE_neg	0.1663	0.76084
3-METHOXY-4-HYDROXYMANDELATE_neg	0.13818	0.14201
3-METHYL-2-OXINDOLE_pos	0.50877	0.42586
3-METHYL-2-OXOVALERIC ACID_neg	-0.18918	0.80026
3-METHYLGLUTARIC ACID_neg	-0.023146	0.022507
3-NITRO-L-TYROSINE_neg	0.055977	0.24878
3-SULFINO-L-ALANINE_neg	0.0068624	0.061739
3-UREIDOPROPIONATE_neg	0.67558	1.5884
3,4-DIHYDROXYPHENYL GLYCOL_neg	-0.0068786	0.017407
4-ACETAMIDOBUTANOATE_neg	-0.24998	0.71314
4-ACETAMIDOBUTANOATE_pos	-0.30021	1.2077
4-AMINOBUTANOATE_neg	0.009172	0.062746
4-AMINOBUTANOATE_pos	-0.020992	0.11295
4-COUMARATE_neg	1.0697	1.7567
4-GUANIDINOBUTANOATE_pos	-0.067298	0.38058
4-HYDROXY-2-QUINOLINECARBOXYLIC ACID_neg	-0.15601	0.17141
4-HYDROXY-2-QUINOLINECARBOXYLIC ACID_pos	-0.1198	0.3332
4-HYDROXY-3-METHOXYPHENYLGLYCOL_neg	0.095818	1.3112
4-HYDROXY-L-PHENYLGLYCINE_pos	0.0050321	0.038906
4-HYDROXY-L-PROLINE_neg	0.011899	0.050498
4-HYDROXYBENZOATE_neg	0.32757	1.5677
4-IMIDAZOLEACETIC ACID_pos	-0.024013	0.16566
4-METHYLCATECHOL_neg	0.29108	0.63491
4-PYRIDOXATE_neg	-0.34314	0.47729
4-PYRIDOXATE_pos	-0.34708	0.79978
5-AMINOPENTANOATE_neg	0.03244	0.13418
5-HYDROXYINDOLEACETATE_neg	-0.44924	0.69126
5-METHYLCYTOSINE HYDROCLORIDE_pos	-0.11727	0.62415
5-OXO-L-PROLINE_neg	-0.2085	1.0338
5-OXO-L-PROLINE_pos	-0.13767	0.68504
5,6-DIHYDROURACIL_pos	-0.13049	0.22208
5'-CMP_pos	0.076066	0.35669
5'-METHYLTHIOADENOSINE_neg	-0.038917	0.11106
5'-METHYLTHIOADENOSINE_pos	-0.21718	0.75941
ACETOACETATE_neg	-0.080475	0.15885
ACETOACETATE_pos	0.001327	0.0046879
ACETYLCHOLINE_pos	-0.070162	0.41462
ADENINE_neg	-0.092355	0.49568
ADENINE_pos	0.10068	0.4351
ADENOSINE 5'-DIPHOSPHATE_neg	0.12627	0.62183
ADENOSINE 5'-DIPHOSPHATE_pos	0.12781	0.52741
ADENOSINE 5'-MONOPHOSPHATE_neg	0.11989	1.4204
ADENOSINE 5'-MONOPHOSPHATE_pos	0.15677	0.51333
ADENOSINE 5'-TRIPHOSPHATE_pos	0.15718	0.46712
ADENOSINE_pos	0.13727	0.16807
ADIPIC ACID_pos	-0.15078	1.9722
ALLANTOIN_neg	-0.15179	1.3528
ALLANTOIN_pos	-0.092658	0.76277
ALPHA-AMINOADIPATE_neg	0.12482	0.87163
ALPHA-AMINOADIPATE_pos	-0.011219	0.12929
ALPHA-D-GLUCOSE 1-PHOSPHATE_neg	0.27154	1.3384
ALPHA-KETOGLUTARIC ACID_neg	0.04792	0.092828
ARACHIDIC ACID_neg	0.040725	0.027904
Beta-ALANINE_neg	0.12911	0.87048
Beta-ALANINE_pos	0.050849	0.42063
BETAINE_neg	-0.2704	0.7596
BETAINE_pos	-0.039925	0.17444
BIS2-ETHYLHEXYLPHTHALATE_pos	0.23253	0.94078
BUTANAL_pos	-0.21997	0.62619
CAFFEATE_neg	0.81874	0.86633
CAPRYLIC ACID_neg	0.37445	1.1338
CARNOSINE_neg	-0.24995	1.593
CARNOSINE_pos	-0.49543	1.2205
CHOLINE_pos	-0.082019	0.66448
cis-5,8,11,14,17-Eicosapentaenoic acid_neg	-0.56117	0.90967
cis-5,8,11,14,17-Eicosapentaenoic acid_pos	0.19631	0.48137
CITRAMALATE_neg	0.04334	0.30483
CITRATE_neg	0.029369	0.060532
CITRULLINE_neg	-0.15992	0.27336
CITRULLINE_pos	-0.2608	0.81929
CREATINE_neg	-0.26873	0.80207
CREATINE_pos	0.20462	1.5372
CREATININE_neg	0.20326	0.82736
CREATININE_pos	0.068404	0.42852
CYTIDINE 5'-DIPHOSPHATE_neg	0.048397	0.31514
CYTIDINE 5'-DIPHOSPHATE_pos	0.23493	0.97915
CYTIDINE 5'-DIPHOSPHOCHOLINE_pos	0.1464	0.41783
CYTIDINE 5'-TRIPHOSPHATE_pos	0.064183	0.0887
CYTIDINE_neg	-0.20921	0.53967
CYTIDINE_pos	0.2046	0.64316
CYTOSINE_pos	-0.11442	0.77344
D---3-PHOSPHOGLYCERIC ACID_neg	0.087798	0.84865
D---3-PHOSPHOGLYCERIC ACID_pos	0.40955	0.3515
D---ARABINOSE_neg	-0.19392	0.81949
D--GALACTOSAMINE_pos	-0.26865	1.5015
D--GLUCOSAMINE_pos	-0.2706	1.4964
D-FRUCTOSE_neg	-0.38276	1.3911
D-GLUCONATE_neg	-0.020298	0.055024
D-GLUCOSAMINE 6-PHOSPHATE_neg	-0.30838	1.3021
D-GLUCOSAMINE 6-PHOSPHATE_pos	0.039611	0.069764
D-GLUCOSE 6-PHOSPHATE_pos	0.23221	0.50722
D-GLUCOSE-6-PHOSPHATE_neg	0.15254	0.61135
D-GLUCURONIC ACID_neg	-0.091206	0.1475
D-GLUCURONOLACTONE_neg	1.6441	1.8608
D-GLYCERIC ACID_neg	-0.012982	0.031849
D-LACTOSE_pos	0.29746	0.4653
D-MANNOSAMINE_pos	-0.72388	1.4394
D-PANTOTHENIC ACID_neg	-0.078289	0.71046
D-PANTOTHENIC ACID_pos	-0.10135	1.044
D-RIBOSE 5-PHOSPHATE_neg	0.31825	0.314
D-RIBOSE_neg	-0.042129	0.1808
D-SORBITOL_neg	-0.2056	1.8231
D-SORBITOL_pos	-0.072288	1.568
D-XYLOSE_neg	-0.18663	0.81363
DAMP_pos	0.010548	0.0090197
DECANOATE_neg	0.21076	1.8773
DEOXYCARNITINE_pos	-0.070162	0.41462
DEOXYCYTIDINE_neg	0.12651	0.15578
DEOXYCYTIDINE_pos	-0.11886	0.58885
DEOXYURIDINE_neg	-0.2081	1.094
DIACETYL_neg	0.18551	1.2595
DIACETYL_pos	-0.096018	0.12061
DIETHYL 2-METHYL-3-OXOSUCCINATE_neg	0.22099	2.1999
DIMETHYLBENZIMIDAZOLE_pos	0.13044	0.83051
DOCOSAHEXAENOIC ACID_neg	-0.13165	0.38841
ELAIDIC ACID_neg	-0.010535	0.027415
ERYTHRITOL_neg	-0.14881	0.67878
ETHYLMALONIC ACID_neg	-0.21092	0.60272
FERULATE_neg	0.28882	0.31003
FOLIC ACID_pos	-0.49403	0.69191
FORMYL-L-METHIONYL PEPTIDE_neg	-0.029401	0.13783
FORMYL-L-METHIONYL PEPTIDE_pos	-0.055146	0.066766
FUMARATE_neg	0.24003	1.9306
GAMMA-LINOLENIC ACID_neg	-0.11322	0.17572
GAMMA-LINOLENIC ACID_pos	0.70341	2.3808
GLUTARIC ACID_neg	-0.069489	0.37309
GLUTATHIONE_neg	0.249	0.32474
GLUTATHIONE_pos	0.193	0.61406
GLYCERALDEHYDE 3-PHOSPHATE DIETHYL ACETAL_neg	-0.15583	0.63662
GLYCEROL 2-PHOSPHATE_pos	0.14856	0.34232
GLYCINE_neg	0.072688	0.36113
GLYCINE_pos	0.028402	0.20908
GUANIDINOACETATE_neg	-0.047784	0.11075
GUANIDINOACETATE_pos	-0.038899	0.90067
GUANINE_pos	0.041643	0.27712
GUANOSINE 5'-DIPHOSPHATE_neg	-0.04542	0.16484
GUANOSINE 5'-DIPHOSPHATE_pos	-0.10264	0.1857
GUANOSINE 5'-MONOPHOSPHATE_neg	0.10067	0.54597
GUANOSINE 5'-MONOPHOSPHATE_pos	0.086416	0.20274
GUANOSINE 5'-TRIPHOSPHATE_neg	0.22723	0.11651
GUANOSINE 5'-TRIPHOSPHATE_pos	0.71637	0.54453
HEPTADECANOATE_neg	0.15514	0.2492
HEPTANOIC ACID_neg	-0.2808	0.52724
HEPTANOIC ACID_pos	0.30463	0.58632
HIPPURATE_neg	-0.20811	1.0586
HIPPURATE_pos	-0.36817	1.3359
HISTAMINE_pos	-0.033981	0.16716
HOMOCYSTEINE_pos	-0.64314	1.0437
HYPOTAURINE_neg	0.25271	1.6519
HYPOTAURINE_pos	0.25511	1.1769
HYPOXANTHINE_neg	-0.1655	0.48304
HYPOXANTHINE_pos	-0.093631	0.26261
INDOLE-3-ACETALDEHYDE_pos	-0.1755	0.73258
INDOLE-3-ACETAMIDE_pos	-0.43496	0.37115
INOSINE_neg	-0.024499	0.055029
INOSINE_pos	0.53381	0.46654
ITACONATE_neg	0.045821	0.34028
L-ALANINE_neg	-0.24399	0.65705
L-ALANINE_pos	0.13994	0.66846
L-ARABITOL_pos	-0.19354	0.80022
L-ARGININE_neg	-0.23116	1.3095
L-ASPARAGINE_neg	0.13611	0.96971
L-ASPARAGINE_pos	0.069196	0.37421
L-ASPARTATE_neg	0.074861	1.2864
L-ASPARTATE_pos	0.15165	1.0544
L-CARNITINE_pos	0.036243	0.15916
L-CYSTATHIONINE_neg	0.14079	0.31694
L-CYSTATHIONINE_pos	-0.0090969	0.029898
L-CYSTEIC ACID_neg	-0.026288	0.22628
L-GLUTAMIC ACID_neg	0.093452	0.85143
L-GLUTAMIC ACID_pos	0.061837	0.40447
L-GLUTAMINE_neg	0.17306	2.6188
L-GLUTAMINE_pos	0.028761	0.25027
L-HISTIDINE_neg	0.00074787	0.0038271
L-ISOLEUCINE_neg	-0.074914	0.94168
L-KYNURENINE_neg	-0.8631	0.65098
L-KYNURENINE_pos	-0.0082787	0.17407
L-LYSINE MONOHYDROCHLORIDE_pos	-0.32692	1.4359
L-LYSINE_neg	-0.2081	0.76804
L-METHIONINE_neg	-0.071348	0.39755
L-METHIONINE_pos	-0.077433	0.45934
L-ORNITHINE_neg	-0.25859	1.1127
L-ORNITHINE_pos	-0.21732	1.9837
L-PHENYLALANINE_neg	-0.053589	0.41346
L-PHENYLALANINE_pos	-0.12663	1.0637
L-PROLINE_neg	-0.050862	0.27054
L-PROLINE_pos	-0.0021101	0.013338
L-RHAMNOSE_neg	0.11344	0.29802
L-SERINE_neg	0.11031	1.3461
L-SERINE_pos	0.033829	0.43081
L-THREONINE_neg	-0.18	0.43729
L-THREONINE_pos	-0.20834	1.0526
L-TRYPTOPHAN_neg	-0.029549	0.2355
L-TRYPTOPHAN_pos	-0.16319	2.2433
L-TYROSINE_neg	0.033088	0.24805
L-TYROSINE_pos	0.036782	0.71673
L-VALINE_neg	-0.038822	0.22315
L-VALINE_pos	-0.13647	1.1601
LAURIC ACID_neg	0.14683	0.4468
LAUROYLCARNITINE_pos	0.35614	0.63378
LEUCINE_neg	-0.085252	1.3494
LINOLEATE_neg	0.26259	0.43722
MALONATE_neg	1.3235	3.4118
MESO-TARTARIC ACID_neg	1.6725	3.1473
METHYL ACETOACETATE_neg	-0.37269	3.0638
METHYL ACETOACETATE_pos	-0.94466	0.61675
METHYL JASMONATE_neg	0.61791	0.78486
METHYL JASMONATE_pos	0.31267	1.714
MONO-METHYL GLUTARATE_neg	0.13901	0.89857
MONO-METHYL GLUTARATE_pos	-0.34896	0.41242
MYO-INOSITOL_neg	0.10191	0.27196
MYRISTIC ACID_neg	0.16488	0.51614
N-ACETYL-D-MANNOSAMINE_neg	0.096641	0.32083
N-ACETYL-D-MANNOSAMINE_pos	0.048984	0.14418
N-ACETYL-D-TRYPTOPHAN_pos	0.55423	0.3437
N-ACETYL-DL-GLUTAMIC ACID_neg	0.050383	0.20305
N-ACETYL-DL-GLUTAMIC ACID_pos	0.0056193	0.0042776
N-ACETYL-DL-METHIONINE_neg	0.29128	0.5004
N-ACETYL-DL-METHIONINE_pos	-0.44041	0.6868
N-ACETYL-DL-SERINE_neg	0.059741	0.28793
N-ACETYL-L-ALANINE_neg	0.13693	0.63981
N-ACETYL-L-ALANINE_pos	0.0064168	0.047776
N-ACETYL-L-ASPARTIC ACID_neg	0.1052	1.1533
N-ACETYL-L-ASPARTIC ACID_pos	0.28383	1.2822
N-ACETYL-L-CYSTEINE_neg	-0.23232	0.74757
N-ACETYL-L-CYSTEINE_pos	0.17029	0.096404
N-ACETYL-L-LEUCINE_neg	-0.033026	0.11029
N-ACETYL-L-LEUCINE_pos	-0.38959	1.1184
N-ACETYL-L-PHENYLALANINE_pos	0.18889	0.80897
N-ACETYL-L-PROLINE_neg	-0.31382	1.3372
N-ACETYL-L-PROLINE_pos	0.017547	0.053551
N-ACETYLNEURAMINATE_neg	-0.024025	0.099159
N-ACETYLNEURAMINATE_pos	-0.30648	1.4701
N-ACETYLPUTRESCINE_pos	0.33662	1.4039
N-ACETYLSEROTONIN_pos	0.42523	0.35586
N-ALPHA-ACETYL-L-ASPARAGINE_neg	0.062676	0.11803
N-ALPHA-ACETYL-L-ASPARAGINE_pos	-0.11133	0.31572
N-FORMYLGLYCINE_neg	-0.28421	0.23282
N-FORMYLGLYCINE_pos	0.20697	0.23952
N-METHYL-D-ASPARTIC ACID_neg	0.12964	0.49526
N-METHYL-D-ASPARTIC ACID_pos	-0.017534	0.034915
N-METHYL-L-GLUTAMATE_pos	-0.0466	0.22449
N,N-DIMETHYL-1,4-PHENYLENEDIAMINE_pos	-0.11177	0.5705
N6-DELTA2-ISOPENTENYL-ADENINE_pos	0.077776	0.12602
NAD_pos	0.85109	1.2381
NALPHA-ACETYL-L-LYSINE_neg	0.5084	1.9902
NALPHA-ACETYL-L-LYSINE_pos	-0.092671	0.28253
NEPSILON,NEPSILON,NEPSILON-TRIMETHYLLYSINE_pos	-0.11625	0.86119
NG-NG-DIMETHYLARGININE DIHYDROCHLORIDE_neg	-0.30772	0.81789
NG-NG-DIMETHYLARGININE DIHYDROCHLORIDE_pos	-0.23626	0.66678
NICOTINAMIDE_neg	-0.33202	0.89321
NICOTINAMIDE_pos	-0.23029	0.81545
NICOTINATE_neg	-0.064019	0.10542
NICOTINATE_pos	0.012233	0.024397
NONANOATE_neg	0.59779	1.0131
O-ACETYL-L-CARNITINE_neg	0.016916	0.032622
O-ACETYL-L-CARNITINE_pos	-0.13615	0.82106
O-ACETYL-L-SERINE_pos	-0.015094	0.03472
O-PHOSPHO-L-SERINE_neg	0.16356	0.44189
O-PHOSPHO-L-SERINE_pos	0.22108	0.99322
O-PHOSPHORYLETHANOLAMINE_neg	0.046077	0.073189
O-PHOSPHORYLETHANOLAMINE_pos	0.11991	0.21196
O-SUCCINYL-L-HOMOSERINE_neg	-0.13592	0.38662
O-SUCCINYL-L-HOMOSERINE_pos	-0.47473	1.3244
OLEATE_neg	-0.010535	0.027415
OMEGA-HYDROXYDODECANOIC ACID_neg	0.37286	0.51333
OPHTHALMIC ACID_neg	0.11328	0.55141
OPHTHALMIC ACID_pos	0.10699	0.35293
OROTIC ACID_neg	-0.014737	0.075683
OXALIC ACID_neg	1.0527	1.117
PALMITATE_neg	0.098803	0.23509
PALMITOLEIC ACID_neg	0.36117	0.39446
PALMITOYL-DL-CARNITINE CHLORIDE_pos	0.10528	0.53096
PENTANOATE_neg	0.06898	0.32367
PHENYLACETALDEHYDE_pos	-0.26879	0.20099
PHENYLPYRUVATE_neg	1.0697	1.7567
PHOSPHOCHOLINE_neg	0.37678	0.92081
PHOSPHOCHOLINE_pos	0.023574	0.17037
PHOSPHOCREATINE_neg	-0.29266	2.0371
PHOSPHOCREATINE_pos	-0.34641	1.8217
PHOSPHONOACETATE_neg	0.17947	0.21306
PIPECOLATE_pos	-0.057833	0.33759
PROPIONATE_neg	0.12845	0.50633
PYRIDINE-2,3-DICARBOXYLATE_neg	-0.040101	0.038908
PYRIDOXAL 5'-PHOSPHATE_neg	0.40601	0.3243
PYRIDOXAL 5'-PHOSPHATE_pos	0.68945	1.3105
PYRIDOXAL_neg	-0.19428	0.58247
PYRIDOXAL_pos	-0.29986	1.6928
PYRIDOXAMINE_pos	-0.017766	0.03201
PYRIDOXINE_neg	-0.12522	0.56801
PYRIDOXINE_pos	-0.27336	1.2695
PYRROLE-2-CARBOXYLATE_neg	0.13448	0.88522
PYRUVATE_neg	-0.73458	1.0659
QUINATE_neg	-0.0091673	0.068731
QUINOLINE_pos	-0.17409	0.71222
RAC-GLYCEROL 1-MYRISTATE_neg	0.60685	0.43551
RETINOATE_neg	0.51862	0.3139
RIBITOL_neg	0.082078	0.41981
RS-MEVALONIC ACID LITHIUM SALT_neg	-0.38847	0.80329
S-5'-ADENOSYL-L-HOMOCYSTEINE_neg	-0.18104	0.84973
S-5'-ADENOSYL-L-HOMOCYSTEINE_pos	-0.16688	1.1466
S-5'-ADENOSYL-L-METHIONINE_pos	0.48204	0.70081
S-DIHYDROOROTATE_neg	-0.39113	0.53014
S-HEXYL-GLUTATHIONE_neg	0.080281	0.084804
S-HEXYL-GLUTATHIONE_pos	0.92626	2.3714
S-MALATE_neg	0.24814	2.0331
SALICYLAMIDE_pos	-0.16718	0.89607
SHIKIMATE_neg	-0.028807	0.19505
SN-GLYCEROL 3-PHOSPHATE_neg	0.080636	0.40748
SN-GLYCEROL 3-PHOSPHATE_pos	-0.14072	0.27928
SODIUM BENZOATE_neg	0.10477	0.5921
SODIUM GLYCOCHENODEOXYCHOLATE_neg	-0.47028	1.3809
SORBATE_neg	-0.074922	0.29151
STEARATE_neg	0.085891	0.20106
SUCCINIC ACID_neg	-0.14153	0.38492
TAURINE_neg	0.10535	2.2095
TAURINE_pos	0.015382	0.042979
THIAMINE MONOPHOSPHATE_pos	0.31853	0.22053
THIAMINE_pos	-0.30995	1.3719
THYMIDINE 5'-MONOPHOSPHATE_neg	0.42248	1.1194
THYMIDINE_neg	-0.16052	0.63148
THYMINE_neg	-0.089682	0.19977
THYMINE_pos	0.11065	0.14613
TRANS-4-HYDROXYPROLINE_pos	-0.038493	0.041083
TRANS-ACONITATE_neg	-0.074042	0.77975
TRANS-CINNAMALDEHYDE_pos	0.0046062	0.0085537
TRANS-CYCLOHEXANE-1,2-DIOL_pos	0.26619	0.45515
TRIGONELLINE_pos	0.079428	0.49679
URACIL_neg	-0.02687	0.082751
URACIL_pos	-0.52541	0.92626
URATE_neg	0.58746	0.40975
URIDINE 5'-DIPHOSPHATE_neg	0.06495	0.21596
URIDINE 5'-DIPHOSPHATE_pos	0.25288	1.0073
URIDINE 5'-DIPHOSPHO-N-ACETYLGLUCOSAMINE_neg	-0.058931	0.08537
URIDINE 5'-DIPHOSPHO-N-ACETYLGLUCOSAMINE_pos	0.12326	0.13665
URIDINE 5'-DIPHOSPHOGLUCOSE_neg	-0.14991	0.30954
URIDINE 5'-DIPHOSPHOGLUCURONIC ACID_neg	-0.010213	0.025829
URIDINE_neg	-0.096362	0.17092
URIDINE-5-MONOPHOSPHATE_neg	-0.15777	1.8261
URIDINE-5-MONOPHOSPHATE_pos	-0.13845	0.78122
UROCANATE_pos	0.39336	0.28741
XANTHINE_neg	-0.16372	0.50906
XANTHOSINE_neg	-0.64909	0.54608
