# Supplementary material for: Cysteine dioxygenase 1 is a metabolic liability for non-small cell lung cancer
Source: eLife. 2019 May 20;8:e45572. doi: 10.7554/eLife.45572 (PMC6584702; doi:10.7554/eLife.45572)
Supplement: Figure 1—source data 1. [file elife-45572-fig1-data1.xlsx]

## Sheet: Figure 1c
	log2(Fold Change)	-log(P-value)
1-AMINOCYCLOPROPANE-1-CARBOXYLATE_neg	-0.24994	0.12852
1-AMINOCYCLOPROPANE-1-CARBOXYLATE_pos	0.058012	0.10026
10-HYDROXYDECANOATE_neg	0.34148	0.49374
2-DEOXY-D-GLUCOSE_neg	0.34362	0.37738
2-DEOXY-D-GLUCOSE_pos	-0.15994	0.19476
2-HYDROXY-4-METHYLTHIOBUTYRIC ACID_neg	-1.0655	1.2038
2-HYDROXYBUTYRIC ACID_neg	-0.73513	0.52147
2-HYDROXYPHENYLACETIC ACID_neg	-0.33743	0.38045
2-METHYLPROPANOATE_neg	-0.060621	0.16679
2-OXOADIPIC ACID_neg	0.55035	0.65588
2-QUINOLINECARBOXYLIC ACID_neg	-0.28713	0.29532
2-QUINOLINECARBOXYLIC ACID_pos	-0.1255	0.10699
2,3-DIHYDROXYBENZOATE_neg	0.20251	0.18698
2,6-DIHYDROXYPYRIDINE_pos	0.8286	1.2023
2'-DEOXYGUANOSINE 5'-MONOPHOSPHATE_pos	0.24046	0.33039
3-2-HYDROXYPHENYLPROPANOATE_neg	-0.40862	0.46111
3-4-HYDROXYPHENYLLACTATE_neg	-0.72767	1.9293
3-4-HYDROXYPHENYLPYRUVATE_neg	-0.98151	0.84623
3-AMINOISOBUTANOATE_neg	0.036954	0.03541
3-HYDROXY-3-METHYLGLUTARATE_neg	0.020515	0.01918
3-HYDROXYPHENYLACETATE_neg	-0.33743	0.38045
3-METHOXY-4-HYDROXYMANDELATE_neg	1.1505	0.88089
3-METHYL-2-OXINDOLE_pos	0.65411	0.44649
3-METHYL-2-OXOVALERIC ACID_neg	-0.94931	0.94258
3-METHYLGLUTARIC ACID_neg	0.18705	0.56472
3-NITRO-L-TYROSINE_neg	0.059841	0.52054
3-SULFINO-L-ALANINE_neg	4.8828	2.6467
3-UREIDOPROPIONATE_neg	0.34749	0.18477
3,4-DIHYDROXYPHENYL GLYCOL_neg	-0.036302	0.055364
4-ACETAMIDOBUTANOATE_neg	-0.36842	0.38443
4-ACETAMIDOBUTANOATE_pos	-0.52131	0.44452
4-AMINOBUTANOATE_neg	-0.041768	0.16111
4-AMINOBUTANOATE_pos	0.37873	0.82709
4-COUMARATE_neg	-0.32111	1.2149
4-GUANIDINOBUTANOATE_pos	-1.0423	2.0478
4-HYDROXY-2-QUINOLINECARBOXYLIC ACID_neg	-0.66714	0.66052
4-HYDROXY-2-QUINOLINECARBOXYLIC ACID_pos	0.1649	0.13315
4-HYDROXY-3-METHOXYPHENYLGLYCOL_neg	-0.082792	0.10993
4-HYDROXY-L-PHENYLGLYCINE_pos	1.4572	0.96671
4-HYDROXY-L-PROLINE_neg	0.036116	0.039439
4-HYDROXYBENZOATE_neg	-0.36356	0.28052
4-IMIDAZOLEACETIC ACID_pos	-0.14903	0.52462
4-METHYLCATECHOL_neg	-0.13659	0.13834
4-PYRIDOXATE_neg	-0.57506	0.34747
4-PYRIDOXATE_pos	-0.3064	0.25048
5-AMINOPENTANOATE_neg	0.10981	0.20683
5-HYDROXYINDOLEACETATE_neg	-0.21956	0.20417
5-METHYLCYTOSINE HYDROCLORIDE_pos	-0.64511	0.55574
5-OXO-L-PROLINE_neg	-0.2644	0.30929
5-OXO-L-PROLINE_pos	-0.085394	0.18681
5,6-DIHYDROURACIL_pos	0.070467	0.25418
5'-CMP_pos	0.0038051	0.0034541
5'-METHYLTHIOADENOSINE_neg	-0.28701	1.1869
5'-METHYLTHIOADENOSINE_pos	-0.37846	1.6804
ACETOACETATE_neg	-0.27682	0.45454
ACETOACETATE_pos	-0.21521	0.43882
ACETYLCHOLINE_pos	0.12024	0.27737
ADENINE_neg	-0.29441	1.9832
ADENINE_pos	0.081111	0.1738
ADENOSINE 5'-DIPHOSPHATE_neg	0.25233	0.48968
ADENOSINE 5'-DIPHOSPHATE_pos	0.14098	0.27177
ADENOSINE 5'-MONOPHOSPHATE_neg	0.34611	0.36833
ADENOSINE 5'-MONOPHOSPHATE_pos	0.077685	0.10191
ADENOSINE 5'-TRIPHOSPHATE_pos	0.59835	1.0013
ADENOSINE_pos	-0.088955	0.19558
ADIPIC ACID_pos	-0.24867	0.30052
ALLANTOIN_neg	-0.132	0.14815
ALLANTOIN_pos	-0.13693	0.14081
ALPHA-AMINOADIPATE_neg	0.60529	1.6013
ALPHA-AMINOADIPATE_pos	0.62867	1.4544
ALPHA-D-GLUCOSE 1-PHOSPHATE_neg	0.47427	1.1473
ALPHA-KETOGLUTARIC ACID_neg	-1.4923	2.7279
ARACHIDIC ACID_neg	-0.43699	0.18676
Beta-ALANINE_neg	-0.063445	0.17473
Beta-ALANINE_pos	0.46301	1.0216
BETAINE_neg	-0.74771	0.40929
BETAINE_pos	0.011164	0.023952
BIS2-ETHYLHEXYLPHTHALATE_pos	0.23247	0.16427
BUTANAL_pos	0.16737	0.38057
CAFFEATE_neg	0.52577	0.27608
CAPRYLIC ACID_neg	0.1553	0.99914
CARNOSINE_neg	-0.2349	0.40387
CARNOSINE_pos	0.35771	0.51827
CHOLINE_pos	0.2071	0.11082
cis-5,8,11,14,17-Eicosapentaenoic acid_neg	-0.1302	0.22083
cis-5,8,11,14,17-Eicosapentaenoic acid_pos	0.26771	1.1292
CITRAMALATE_neg	0.07978	0.092871
CITRATE_neg	0.65449	1.0753
CITRULLINE_neg	-0.84992	0.76138
CITRULLINE_pos	-0.24154	0.34965
CREATINE_neg	0.37933	0.58218
CREATINE_pos	0.35132	0.89495
CREATININE_neg	0.5982	0.78966
CREATININE_pos	0.55359	0.8198
CYTIDINE 5'-DIPHOSPHATE_neg	0.13956	0.22691
CYTIDINE 5'-DIPHOSPHATE_pos	0.10388	0.22755
CYTIDINE 5'-DIPHOSPHOCHOLINE_pos	0.20606	0.48696
CYTIDINE 5'-TRIPHOSPHATE_pos	0.5549	0.49424
CYTIDINE_neg	-0.13481	0.11773
CYTIDINE_pos	0.37087	0.53277
CYTOSINE_pos	-0.093694	0.29526
D---3-PHOSPHOGLYCERIC ACID_neg	-0.036436	0.10251
D---3-PHOSPHOGLYCERIC ACID_pos	-0.37203	0.72067
D---ARABINOSE_neg	0.10421	0.094419
D--GALACTOSAMINE_pos	-0.15677	0.28585
D--GLUCOSAMINE_pos	-0.1586	0.28667
D-FRUCTOSE_neg	-0.22808	0.19194
D-GLUCONATE_neg	0.76326	1.8685
D-GLUCOSAMINE 6-PHOSPHATE_neg	0.8359	1.764
D-GLUCOSAMINE 6-PHOSPHATE_pos	0.28223	0.35325
D-GLUCOSE 6-PHOSPHATE_pos	0.27293	0.52813
D-GLUCOSE-6-PHOSPHATE_neg	0.42942	0.89364
D-GLUCURONIC ACID_neg	-0.17763	0.16843
D-GLUCURONOLACTONE_neg	0.48076	0.9056
D-GLYCERIC ACID_neg	-0.16532	0.19389
D-LACTOSE_pos	-0.71326	0.62321
D-MANNOSAMINE_pos	-0.13514	0.085356
D-PANTOTHENIC ACID_neg	-0.5225	0.84523
D-PANTOTHENIC ACID_pos	-0.51835	0.99092
D-RIBOSE 5-PHOSPHATE_neg	-1.0112	1.0015
D-RIBOSE_neg	-0.13002	0.2169
D-SORBITOL_neg	-0.22138	0.30216
D-SORBITOL_pos	-0.20539	0.23743
D-XYLOSE_neg	0.078319	0.075662
DAMP_pos	-0.70629	0.66274
DECANOATE_neg	-0.031682	0.063263
DEOXYCARNITINE_pos	0.12024	0.27737
DEOXYCYTIDINE_neg	0.59164	0.99349
DEOXYCYTIDINE_pos	0.13393	0.3296
DEOXYURIDINE_neg	-0.22632	0.52236
DIACETYL_neg	-0.089783	0.16873
DIACETYL_pos	0.11881	0.27969
DIETHYL 2-METHYL-3-OXOSUCCINATE_neg	-0.28049	0.34952
DIMETHYLBENZIMIDAZOLE_pos	-0.41016	0.34203
DOCOSAHEXAENOIC ACID_neg	-0.16027	0.1968
ELAIDIC ACID_neg	-0.44589	0.37737
ERYTHRITOL_neg	-0.41752	0.40026
ETHYLMALONIC ACID_neg	-0.22148	0.19841
FERULATE_neg	-0.14902	0.069398
FOLIC ACID_pos	-0.29046	0.20881
FORMYL-L-METHIONYL PEPTIDE_neg	0.26078	1.1263
FORMYL-L-METHIONYL PEPTIDE_pos	0.62683	0.79426
FUMARATE_neg	-0.17805	0.51955
GAMMA-LINOLENIC ACID_neg	-0.40209	0.20769
GAMMA-LINOLENIC ACID_pos	0.41602	0.89577
GLUTARIC ACID_neg	0.3688	2.1669
GLUTATHIONE_neg	4.1817	3.6854
GLUTATHIONE_pos	3.7201	4.5108
GLYCERALDEHYDE 3-PHOSPHATE DIETHYL ACETAL_neg	-0.28953	0.40081
GLYCEROL 2-PHOSPHATE_pos	0.27896	0.87364
GLYCINE_neg	0.20514	1.3916
GLYCINE_pos	0.28721	0.83146
GUANIDINOACETATE_neg	-0.036977	0.053239
GUANIDINOACETATE_pos	0.094196	0.24727
GUANINE_pos	-0.39807	0.90563
GUANOSINE 5'-DIPHOSPHATE_neg	0.26543	0.46876
GUANOSINE 5'-DIPHOSPHATE_pos	0.11551	0.34877
GUANOSINE 5'-MONOPHOSPHATE_neg	0.21959	0.2595
GUANOSINE 5'-MONOPHOSPHATE_pos	0.23508	0.30946
GUANOSINE 5'-TRIPHOSPHATE_neg	1.1788	0.73494
GUANOSINE 5'-TRIPHOSPHATE_pos	0.87573	0.7703
HEPTADECANOATE_neg	-0.71466	0.74758
HEPTANOIC ACID_neg	-0.15745	0.18247
HEPTANOIC ACID_pos	0.23107	0.8631
HIPPURATE_neg	-0.55031	0.37241
HIPPURATE_pos	-0.011546	0.010471
HISTAMINE_pos	-0.42499	0.39983
HOMOCYSTEINE_pos	0.67317	0.63108
HYPOTAURINE_neg	2.7332	2.5421
HYPOTAURINE_pos	2.5524	2.6257
HYPOXANTHINE_neg	-0.058527	0.060399
HYPOXANTHINE_pos	-0.125	0.15052
INDOLE-3-ACETALDEHYDE_pos	-0.2529	0.18365
INDOLE-3-ACETAMIDE_pos	-0.43076	0.25566
INOSINE_neg	-0.021017	0.024741
INOSINE_pos	-0.1888	0.24379
ITACONATE_neg	0.010766	0.016373
L-ALANINE_neg	0.43918	0.8206
L-ALANINE_pos	0.010567	0.014858
L-ARABITOL_pos	0.14187	0.16068
L-ARGININE_neg	-0.12508	0.15597
L-ASPARAGINE_neg	-0.023818	0.025941
L-ASPARAGINE_pos	-0.0033475	0.0062742
L-ASPARTATE_neg	-0.27989	0.82326
L-ASPARTATE_pos	-0.30017	0.94166
L-CARNITINE_pos	0.19138	0.72858
L-CYSTATHIONINE_neg	2.3525	2.8581
L-CYSTATHIONINE_pos	1.6095	1.3861
L-CYSTEIC ACID_neg	1.642	3.8286
L-GLUTAMIC ACID_neg	-0.021871	0.10999
L-GLUTAMIC ACID_pos	0.025555	0.0322
L-GLUTAMINE_neg	-0.29665	0.89073
L-GLUTAMINE_pos	-0.11452	0.62466
L-HISTIDINE_neg	-0.22367	0.4865
L-ISOLEUCINE_neg	-0.2032	0.28753
L-KYNURENINE_neg	-1.0139	0.9613
L-KYNURENINE_pos	-0.49964	0.40892
L-LYSINE MONOHYDROCHLORIDE_pos	-0.58306	0.30739
L-LYSINE_neg	-0.087534	0.11085
L-METHIONINE_neg	-0.16741	0.31233
L-METHIONINE_pos	-0.24127	0.30391
L-ORNITHINE_neg	-0.093113	0.10123
L-ORNITHINE_pos	-0.2899	0.27169
L-PHENYLALANINE_neg	-0.21956	0.37689
L-PHENYLALANINE_pos	-0.34894	0.36974
L-PROLINE_neg	0.15586	0.43314
L-PROLINE_pos	0.205	0.65032
L-RHAMNOSE_neg	0.041309	0.072451
L-SERINE_neg	-0.1895	0.65635
L-SERINE_pos	0.35062	0.54462
L-THREONINE_neg	-0.015397	0.010509
L-THREONINE_pos	0.031509	0.05614
L-TRYPTOPHAN_neg	-0.17792	0.22363
L-TRYPTOPHAN_pos	-0.25549	0.24009
L-TYROSINE_neg	-0.18587	0.63763
L-TYROSINE_pos	-0.10811	0.31177
L-VALINE_neg	-0.28687	0.33012
L-VALINE_pos	-0.22101	0.24483
LAURIC ACID_neg	-0.11876	0.17479
LAUROYLCARNITINE_pos	-0.5743	0.58256
LEUCINE_neg	-0.22273	0.29922
LINOLEATE_neg	-0.42442	0.43495
MALONATE_neg	0.31986	1.0965
MESO-TARTARIC ACID_neg	0.58935	0.68633
METHYL ACETOACETATE_neg	-1.3509	0.83217
METHYL ACETOACETATE_pos	0.061843	0.053746
METHYL JASMONATE_neg	0.94028	0.70786
METHYL JASMONATE_pos	0.40625	0.67163
MONO-METHYL GLUTARATE_neg	-0.21801	0.32862
MONO-METHYL GLUTARATE_pos	1.4402	1.5167
MYO-INOSITOL_neg	0.23209	0.4747
MYRISTIC ACID_neg	-0.23255	0.43694
N-ACETYL-D-MANNOSAMINE_neg	0.64365	1.8293
N-ACETYL-D-MANNOSAMINE_pos	0.24257	1.4353
N-ACETYL-D-TRYPTOPHAN_pos	-0.97592	0.71547
N-ACETYL-DL-GLUTAMIC ACID_neg	0.49454	0.46474
N-ACETYL-DL-GLUTAMIC ACID_pos	-0.060428	0.047092
N-ACETYL-DL-METHIONINE_neg	0.46035	0.66029
N-ACETYL-DL-METHIONINE_pos	0.67222	1.348
N-ACETYL-DL-SERINE_neg	0.36861	1.0196
N-ACETYL-L-ALANINE_neg	0.1276	0.41982
N-ACETYL-L-ALANINE_pos	-0.16171	0.68836
N-ACETYL-L-ASPARTIC ACID_neg	0.78401	1.0682
N-ACETYL-L-ASPARTIC ACID_pos	0.51118	1.8398
N-ACETYL-L-CYSTEINE_neg	2.4772	2.6262
N-ACETYL-L-CYSTEINE_pos	2.4138	3.5031
N-ACETYL-L-LEUCINE_neg	-0.69998	1.4716
N-ACETYL-L-LEUCINE_pos	-0.067055	0.13659
N-ACETYL-L-PHENYLALANINE_pos	-0.27346	0.40225
N-ACETYL-L-PROLINE_neg	-0.33412	0.95316
N-ACETYL-L-PROLINE_pos	-0.16953	0.26111
N-ACETYLNEURAMINATE_neg	-0.05522	0.14249
N-ACETYLNEURAMINATE_pos	-0.54434	0.57152
N-ACETYLPUTRESCINE_pos	-0.41361	0.46829
N-ACETYLSEROTONIN_pos	0.42964	0.45476
N-ALPHA-ACETYL-L-ASPARAGINE_neg	-0.60303	0.96167
N-ALPHA-ACETYL-L-ASPARAGINE_pos	-0.17122	0.27374
N-FORMYLGLYCINE_neg	-0.46132	0.20021
N-FORMYLGLYCINE_pos	-0.31305	0.1873
N-METHYL-D-ASPARTIC ACID_neg	0.044464	0.051931
N-METHYL-D-ASPARTIC ACID_pos	-0.035927	0.065751
N-METHYL-L-GLUTAMATE_pos	-0.41736	0.35284
N,N-DIMETHYL-1,4-PHENYLENEDIAMINE_pos	-0.37768	0.4124
N6-DELTA2-ISOPENTENYL-ADENINE_pos	0.16197	0.21229
NAD_pos	0.22828	0.28484
NALPHA-ACETYL-L-LYSINE_neg	-0.54539	0.94922
NALPHA-ACETYL-L-LYSINE_pos	-0.086473	0.12115
NEPSILON,NEPSILON,NEPSILON-TRIMETHYLLYSINE_pos	-0.047078	0.080662
NG-NG-DIMETHYLARGININE DIHYDROCHLORIDE_neg	0.04664	0.040124
NG-NG-DIMETHYLARGININE DIHYDROCHLORIDE_pos	-0.13773	0.16516
NICOTINAMIDE_neg	-0.84177	0.57192
NICOTINAMIDE_pos	-0.0329	0.04938
NICOTINATE_neg	-0.44886	0.60424
NICOTINATE_pos	-0.26698	0.53018
NONANOATE_neg	-0.14591	0.25768
O-ACETYL-L-CARNITINE_neg	-0.84038	0.86764
O-ACETYL-L-CARNITINE_pos	0.66902	1.9164
O-ACETYL-L-SERINE_pos	-0.063483	0.17686
O-PHOSPHO-L-SERINE_neg	-0.89761	1.6056
O-PHOSPHO-L-SERINE_pos	-0.82041	1.7015
O-PHOSPHORYLETHANOLAMINE_neg	-0.050043	0.098296
O-PHOSPHORYLETHANOLAMINE_pos	0.49638	0.64628
O-SUCCINYL-L-HOMOSERINE_neg	0.25948	0.3604
O-SUCCINYL-L-HOMOSERINE_pos	-0.27343	0.1953
OLEATE_neg	-0.44589	0.37737
OMEGA-HYDROXYDODECANOIC ACID_neg	0.57112	0.86959
OPHTHALMIC ACID_neg	-1.2246	0.87657
OPHTHALMIC ACID_pos	-1.1068	2.0026
OROTIC ACID_neg	0.1522	0.33995
OXALIC ACID_neg	0.21379	0.45455
PALMITATE_neg	-0.56334	0.80556
PALMITOLEIC ACID_neg	-0.18199	0.22455
PALMITOYL-DL-CARNITINE CHLORIDE_pos	0.11634	1.441
PENTANOATE_neg	-0.49559	0.34866
PHENYLACETALDEHYDE_pos	1.7326	2.286
PHENYLPYRUVATE_neg	-0.32111	1.2149
PHOSPHOCHOLINE_neg	-0.14808	0.039271
PHOSPHOCHOLINE_pos	0.40418	0.96386
PHOSPHOCREATINE_neg	-0.083959	0.34862
PHOSPHOCREATINE_pos	0.30688	0.423
PHOSPHONOACETATE_neg	0.20979	0.31274
PIPECOLATE_pos	-0.20899	0.56797
PROPIONATE_neg	0.43849	0.32487
PYRIDINE-2,3-DICARBOXYLATE_neg	0.07107	0.066001
PYRIDOXAL 5'-PHOSPHATE_neg	0.57128	0.36437
PYRIDOXAL 5'-PHOSPHATE_pos	-0.0047239	0.0034041
PYRIDOXAL_neg	-0.15232	0.30178
PYRIDOXAL_pos	-0.65935	0.76982
PYRIDOXAMINE_pos	0.53495	0.522
PYRIDOXINE_neg	-0.11448	0.20949
PYRIDOXINE_pos	-0.47392	0.41587
PYRROLE-2-CARBOXYLATE_neg	-0.35976	0.41536
PYRUVATE_neg	-2.2103	0.54917
QUINATE_neg	0.30824	1.4299
QUINOLINE_pos	-0.36006	0.6313
RAC-GLYCEROL 1-MYRISTATE_neg	-0.99456	1.136
RETINOATE_neg	-0.11246	0.21564
RIBITOL_neg	0.69835	0.79544
RS-MEVALONIC ACID LITHIUM SALT_neg	-0.38858	0.33546
S-5'-ADENOSYL-L-HOMOCYSTEINE_neg	2.143	2.6746
S-5'-ADENOSYL-L-HOMOCYSTEINE_pos	2.0281	2.6095
S-5'-ADENOSYL-L-METHIONINE_pos	-0.15855	0.13456
S-DIHYDROOROTATE_neg	0.082888	0.065021
S-HEXYL-GLUTATHIONE_neg	0.0047898	0.011367
S-HEXYL-GLUTATHIONE_pos	0.40553	2.2066
S-MALATE_neg	0.034483	0.06581
SALICYLAMIDE_pos	-0.037399	0.05673
SHIKIMATE_neg	0.49888	1.6803
SN-GLYCEROL 3-PHOSPHATE_neg	0.53336	1.2685
SN-GLYCEROL 3-PHOSPHATE_pos	0.32551	1.8528
SODIUM BENZOATE_neg	-0.10813	0.16434
SODIUM GLYCOCHENODEOXYCHOLATE_neg	-0.45616	0.42784
SORBATE_neg	0.12488	0.18312
STEARATE_neg	-0.6885	0.69126
SUCCINIC ACID_neg	-0.50441	0.55159
TAURINE_neg	0.22773	0.73232
TAURINE_pos	0.47202	1.0467
THIAMINE MONOPHOSPHATE_pos	-3.9766	0.71832
THIAMINE_pos	-2.4418	0.43797
THYMIDINE 5'-MONOPHOSPHATE_neg	0.058018	0.035433
THYMIDINE_neg	-0.36267	0.5965
THYMINE_neg	-0.17236	0.26228
THYMINE_pos	-0.34819	0.29479
TRANS-4-HYDROXYPROLINE_pos	-0.0082157	0.016041
TRANS-ACONITATE_neg	0.51158	0.86845
TRANS-CINNAMALDEHYDE_pos	0.46866	1.2706
TRANS-CYCLOHEXANE-1,2-DIOL_pos	0.34148	1.1878
TRIGONELLINE_pos	0.37249	1.5253
URACIL_neg	-0.11959	0.17847
URACIL_pos	-0.41361	0.35516
URATE_neg	0.58408	0.35228
URIDINE 5'-DIPHOSPHATE_neg	0.26392	0.59184
URIDINE 5'-DIPHOSPHATE_pos	0.11301	0.43332
URIDINE 5'-DIPHOSPHO-N-ACETYLGLUCOSAMINE_neg	1.8867	1.4175
URIDINE 5'-DIPHOSPHO-N-ACETYLGLUCOSAMINE_pos	0.33291	1.087
URIDINE 5'-DIPHOSPHOGLUCOSE_neg	0.54127	1.3743
URIDINE 5'-DIPHOSPHOGLUCURONIC ACID_neg	0.5639	1.48
URIDINE_neg	-0.10722	0.1065
URIDINE-5-MONOPHOSPHATE_neg	1.1661	1.1095
URIDINE-5-MONOPHOSPHATE_pos	0.2666	0.33641
UROCANATE_pos	0.41693	0.18712
XANTHINE_neg	-0.26417	0.34446
XANTHOSINE_neg	1.3009	2.0647

## Sheet: Figure 1d
R554Q	WT
2.75	1.34
1.65	1.91
1.05	2.18

## Sheet: Figure 1e
R554Q	WT
0.37	0.05
0.39	0.04
0.36	0.04

## Sheet: Figure 1f
R554Q	WT
12.15	3.92
13.65	4.05
12.58	4.01

## Sheet: Figure 1g
R554Q	WT
0.064379	0.005618
0.061729	0.00784
0.060858	0.006686

## Sheet: Figure 1h
R554Q	WT
4.59	1.81
5.75	2.29
6.08	2.12

## Sheet: Figure 1i
R554Q	WT
10.59	10.51
12.08	9.94
10.2	9.94
