# Supplementary material for: Cysteine dioxygenase 1 is a metabolic liability for non-small cell lung cancer
Source: eLife. 2019 May 20;8:e45572. doi: 10.7554/eLife.45572 (PMC6584702; doi:10.7554/eLife.45572)
Supplement: Figure 2—source data 1. [file elife-45572-fig2-data1.xlsx]

## Sheet: Figure 2b
	WT			R554Q
Cdo1	1	0.954549	1.06457	0.849746	0.854599	0.957788
Nqo1	1	1.01841	1.0829	10.91	10.9152	10.3056

## Sheet: Figure 2d
		12C			13C
WT	sgCON	0.0156	0.0187	0.013	0.2501	0.2462	0.2595
	sgCDO1#2	0.0212	0.0255	0.0212	0.3079	0.2975	0.2685
	sgCDO1#3	0.0219	0.0218	0.0259	0.2715	0.2792	0.2748
R554Q	sgCON	0.0272	0.0224	0.0245	0.5579	0.5472	0.5586
	sgCDO1#2	0.0358	0.0295	0.0275	0.6833	0.7506	0.6895
	sgCDO1#3	0.0347	0.0318	0.0274	0.6812	0.7018	0.6274

## Sheet: Figure 2e
		12C			13C
WT	sgCON	2.3328	2.4539	2.5023	1.2165	1.2575	1.3055
	sgCDO1#2	3.0322	3.0813	2.9462	1.5789	1.5831	1.5539
	sgCDO1#3	3.227	3.1839	3.233	1.5468	1.517	1.5718
R554Q	sgCON	6.3536	6.2732	6.5776	4.3803	4.2012	4.5793
	sgCDO1#2	6.9015	7.4862	6.8969	5.0663	5.3157	5.0927
	sgCDO1#3	6.9601	7.5743	6.9137	4.5858	4.9101	4.6297

## Sheet: Figure 2f
		13C
WT	sgCON	1.2165	1.2575	1.3055
	sgCDO1#2	1.5789	1.5831	1.5539
	sgCDO1#3	1.5468	1.517	1.5718
R554Q	sgCON	4.3803	4.2012	4.5793
	sgCDO1#2	5.0663	5.3157	5.0927
	sgCDO1#3	4.5858	4.9101	4.6297

## Sheet: Figure 2g
		12C			13C
WT	sgCON	0.0025	0.0038	0.0041	0.5733	0.5592	0.6179
	sgCDO1#2	0.0047	0.0008	0.0025	0.6032	0.5577	0.5633
	sgCDO1#3	0.0081	0.0042	0.0029	0.4347	0.4298	0.6765
R554Q	sgCON	0.0024	0.0023	0.0061	0.4284	0.4058	0.47
	sgCDO1#2	0.0052	0.003	0.0022	0.4925	0.4012	0.4887
	sgCDO1#3	0.0054	0.0011	0.0055	0.5393	0.3401	0.4737

## Sheet: Figure 2h
		12C			13C
WT	sgCON	0.5723	0.5083	0.3991	0.4102	0.2945	0.3308
	sgCDO1#2	0.4463	0.5247	0.6445	0.317	0.3115	0.3575
	sgCDO1#3	0.6138	0.5997	0.5803	0.3441	0.3923	0.4216
R554Q	sgCON	3.6719	2.9815	3.2651	1.6277	1.5284	1.6907
	sgCDO1#2	1.9891	2.1476	2.2361	1.0749	1.2201	1.1651
	sgCDO1#3	2.2106	2.305	1.9684	1.0984	1.3438	1.2226

## Sheet: Figure 2i
		13C
WT	sgCON	0.4102	0.2945	0.3308
	sgCDO1#2	0.317	0.3115	0.3575
	sgCDO1#3	0.3441	0.3923	0.4216
R554Q	sgCON	1.6277	1.5284	1.6907
	sgCDO1#2	1.0749	1.2201	1.1651
	sgCDO1#3	1.0984	1.3438	1.2226
