# Supplementary material for: Cysteine dioxygenase 1 is a metabolic liability for non-small cell lung cancer
Source: eLife. 2019 May 20;8:e45572. doi: 10.7554/eLife.45572 (PMC6584702; doi:10.7554/eLife.45572)
Supplement: Figure 3—source data 1. [file elife-45572-fig3-data1.xlsx]

## Sheet: Figure 3a
Normal	MUT	WT
237.963	14.7375	5.9211
209.949	91.8167	10.0442
192.154	9.396	63.2446
174.923	28.7908	90.2923
191.144	16.292	48.2128
232.219	34.5277	50.2857
131.011	45.398	48.8722
334.661	62.3091	34.3026
258.181	6.2241	42.3108
364.146	15.6771	36.3766
252.887	16.4057	1.7119
480.609	8.3574	72.082
187.565	12.4748	14.3251
91.4402	13.1492	20.4271
166.705	25.3121	26.2712
217.364	18.9974	145.117
217.802	7.9557	5.9234
137.312	130.11	3.1203
330.602	4.5906	27.1883
202.715	14.9741	58.5193
254.349	44.8012	30.2213
319.328	15.1425	10.0192
599.431	6.4309	10.8003
223.52	36.9103	22.5291
72.938	22.6082	46.8332
101.382	12.5571	79.3804
135.299	13.3482	10.5909
445.617	50.4225	32.0452
299.918	22.742	63.2917
303.231	8.9166	17.8259
188.095	10.8443	16.6282
210.581	27.7275	78.9037
159.486	6.5789	13.306
423.227	34.5658	27.5184
133.551	24.4253	25.3651
71.5161	21.6939	26.9076
78.3723	39.0782	64.5161
489.06	2.9528	21.0814
266.929	34.372	9.2807
232.908	14.1865	25.9557
358.758		12.8707
149.645		97.3154
350.904		40.9756
254.399		16.4425
353.434		24.7831
		6.882
		16.6287
		12.2084
		355.062
		71.64
		14.5258
		46.5429
		63.058
		22.4065
		75.4118
		7.3992
		4.6063
		10.6568
		42.2213
		38.1041
		17.1213
		28.3582
		28.7733
		6.8234
		67.6835
		5.9791
		115.238
		1.3944
		14.3218
		20.4361
		5.3308
		8.284
		76.3052
		20.1835
		2.8686
		26.3916
		12.8917
		39.2034
		44.6492
		108.216
		6.8367
		15.0821
		9.6774
		77.6851
		4.0189
		6.2245
		8.4289
		35.8363
		25.6523
		31.492
		43.8966
		24.6212
		80.0915
		41.052
		43.6449
		25.9786
		6.0883
		52.359
		29.4999
		7.0425
		22.2553
		45.977
		6.8707
		62.4054
		25.2845
		80.6916
		43.5931
		6.1538
		21.0608
		92.0139
		43.1856
		52.8423
		115.651
		24.9423
		17.5439
		19.7802
		48.7585
		59.6996
		51.4981
		36.8664
		109.163
		26.2099
		1.0281
		38.0774
		19.1131
		12.2186
		28.2285
		5.395
		65.5738
		14.2857
		6.3836
		3.0832
		42.952
		31.5395
		33.9744
		57.8996
		27.5835
		5.5312
		19.1458
		11.699
		23.0892
		4.6795
		20.5128
		44.6809
		20.7466
		19.5345
		49.389
		8.9686
		43.2057
		20.6052
		39.4773
		33.054
		22.1828
		49.0347
		24.979
		6.5646
		15.4923
		71.0153
		23.3525
		10.1642
		49.4418
		173.333
		50.7553
		16.8387
		34.0694
		42.7083
		5.8662
		17.5607
		45.3457
		54.2912
		66.6667
		11.7306
		35.3535
		16.1668
		10.7427
		77.7311
		49.8034
		49.639
		24.0051
		40.4959
		5.748
		42.0791
		34.9435
		52.3207
		22.011
		15.2444
		10.1266
		16.2938
		10.0436
		16.2438

## Sheet: Figure 3b
Normal	MUT	WT
0.1642	0.450131	0.517609
0.1464	0.450787	0.633985
0.1676	0.612162	0.418727
0.1602	0.559107	0.417385
0.1677	0.0671282	0.405159
0.165	0.428993	0.463768
0.1463	0.493965	0.431341
0.1526	0.631182	0.572042
0.1749	0.445963	0.545232
0.1699	0.591904	0.307276
0.1788	0.444221	0.544981
0.1468	0.685687	0.587013
0.1535	0.358881	0.599555
0.1691	0.626947	0.554196
0.17	0.494723	0.492553
0.169	0.404997	0.485388
0.1685	0.544514	0.477553
0.1531	0.508107	0.34233
0.1651	0.512872	0.433696
0.1628	0.368338	0.549129
0.1557	0.561078	0.270824
0.1536	0.520916	0.39381
0.1524	0.367735	0.501643
0.1617	0.447955	0.376999
0.179	0.591954	0.349174
0.1596	0.449662	0.404916
0.1668	0.318929	0.388882
0.1724	0.58566	0.5947
	0.575511	0.467014
	0.541429	0.604355
		0.455809
		0.349611
		0.357893
		0.47859
		0.402817
		0.487285
		0.487759
		0.485124
		0.345224
		0.295311
		0.298202
		0.390849
		0.495974
		0.081475
		0.458673
		0.462072
		0.5225
		0.399431
		0.495303
		0.627929
		0.380426
		0.318456
		0.405942
		0.549529
		0.498995
		0.433164
		0.335952
		0.595877
		0.420134
		0.496434
		0.228757
		0.254577
		0.417111
		0.162168
		0.393461
		0.445119
		0.432168
		0.383613
		0.439319
		0.48595
		0.53733
		0.288145
		0.359477
		0.589078
		0.284295
		0.385537
		0.160722
		0.467291
		0.45433
		0.549481
		0.476823
		0.444653
		0.479365
		0.293387
		0.212356
		0.569354
		0.652429
		0.437121
		0.608348
		0.529104
		0.36576
		0.432437
		0.34822
		0.436188
		0.449453
		0.377919
		0.555224
		0.135473
		0.419285
		0.513705
		0.406318
		0.35568
		0.41853
		0.477199
		0.135074
		0.395438
		0.58723
		0.107728
		0.13306
		0.40638
		0.298691
		0.607091
		0.358316
		0.29403
		0.523612
		0.434926
		0.50416
		0.49767
		0.428634
		0.583184
		0.300604
		0.697855
		0.403281
		0.485578
		0.61027
		0.176769
		0.588819
		0.59489
		0.559384
		0.563684
		0.485264
		0.499012
		0.502977
		0.454398
		0.15302
		0.616938
		0.53695
		0.489154
		0.386582
		0.417104
		0.753223
		0.465086
		0.27801
		0.277712
		0.516133
		0.542603
		0.597811
		0.306444
		0.368113
		0.29973
		0.486714
		0.405303
		0.305278
		0.402775
		0.431316

## Sheet: Figure 3d
CDO1/aTub	Cysteine (mM)
0.003477	0.129815
0.422793	0.290786
0.055573	0.293614
0.774241	0.53534
0.943011	0.563001
0.640887	0.784717
0.750481	1.70346
0.313649	0.489068
0.108652	0.628489
0.998707	0.685837
2.38177	0.692905
1.84852	1.10018
2.07206	1.71429

## Sheet: Figure 3e
	sgCON				sgCDO1#1				sgCDO1#2
CYS (mM)	0.158671	0.169698	0.162804	0.149084	0.233758	0.259223	0.232279	0.216746	0.251965	0.237683	0.227374	0.230051

## Sheet: Figure 3i
	NRF2 KO
	pLX317			pLX317			NRF2			NRF2
	Y157F			WT			Y157F			WT
	0.163133	0.159166	0.163481	0.09174	0.092238	0.09105	0.918855	0.813323	0.864271	0.072499	0.072062	0.071418
	pLX317						NRF2 T80K
	WT			Y157F			WT			Y157F
H1299	0.062	0.059	0.056	0.065	0.059	0.063	0.186	0.15	0.16	0.147	0.143	0.151
H1975	0.06	0.052	0.059	0.05	0.047	0.049	0.163	0.154	0.148	0.215	0.215	0.228
	KEAP1 C273S						KEAP1 C151S						KEAP1 WT
	Y157F			WT			Y157F			WT			Y157F			WT
H1944	1.24	1.35	1.22	0.82	0.84	0.83	0.65	0.67	0.62	0.47	0.48	0.47	0.63	0.64	0.6	0.5	0.51	0.53

## Sheet: Figure 3j
	NRF2 +												NRF2 -
Day	CDO1WT						CDO1Y157F						CDO1WT						CDO1Y157F
1	0	0	0	0	0	0	0	0.00776	0.0144	0	0.009	0.0157	0	0.00203	0.0102	0.000405	0	0.00325	0.00162	0.00652	0.0102	0.0157	0.00858	0.00325
2	0	0	0.00121	0	0	0	0.0559	0.0679	0.0674	0.0497	0.066	0.0529	0.0199	0.0199	0.0339	0.025	0.0194	0.0263	0.0263	0.0374	0.0254	0.0374	0.0288	0.0301
3	0.0592	0.0613	0.0549	0.0537	0.0741	0.0909	0.361	0.448	0.437	0.407	0.4	0.398	0.175	0.175	0.163	0.255	0.223	0.207	0.218	0.208	0.181	0.218	0.253	0.213

## Sheet: Figure 3k
	CDO1 level	Growth Inhibition (%)
A549	0.998707	29.1676
H1299	0.003477	-8.45137
H1792	0.313649	-23.9894
H1975	0.055573	2.46154
H1993	0.750481	0.021009
H2009	0.943011	35.5724
H2087	0.422793	-8.25142
H2347	0.640887	35.584
H322	2.38177	25.0264
H441	0.774241	42.8967
H460	2.07206	65.4093
HCC15	0.108652	-3.2711
PC9	1.84852	63.9534
