# Supplementary material for: Cysteine dioxygenase 1 is a metabolic liability for non-small cell lung cancer
Source: eLife. 2019 May 20;8:e45572. doi: 10.7554/eLife.45572 (PMC6584702; doi:10.7554/eLife.45572)
Supplement: Figure 4—figure supplement 1—source data 1. [file elife-45572-fig4-figsupp1-data1.xlsx]

## Sheet: Figure 4 S1B
		(CYS)2 (2 e.q.)						CSA (1 e.q.)
H1975	Consumption (nmol/hr/mL cells)	1.90133	2.18193	3.53852
	Production (nmol/hr/mL cells)							0.193161	0.187859	0.179049
H1299	Consumption (nmol/hr/mL cells)	1.33907	1.60513	2.37998
	Production (nmol/hr/mL cells)							0.041601	0.080651	0.021877
NRF2 KO A549 + NRF2	Consumption (nmol/hr/mL cells)	14.46	17.58	14.37	19.68	21.16	20.63
	Production (nmol/hr/mL cells)							3.44	3.07	4.92	4.22	3.59	4.68
A549	Consumption (nmol/hr/mL cells)	2.74249	2.53875	3.23893
	Production (nmol/hr/mL cells)							0.30012	0.25066	0.2876
H322	Consumption (nmol/hr/mL cells)	16.5677	13.0035	13.0401
	Production (nmol/hr/mL cells)							3.98238	4.06979	3.7304
H1944	Consumption (nmol/hr/mL cells)	4.70824	5.05684	6.50153
	Production (nmol/hr/mL cells)							1.03338	1.04839	1.02267
