# Supplementary material for: Cysteine dioxygenase 1 is a metabolic liability for non-small cell lung cancer
Source: eLife. 2019 May 20;8:e45572. doi: 10.7554/eLife.45572 (PMC6584702; doi:10.7554/eLife.45572)
Supplement: Figure 4—source data 1. [file elife-45572-fig4-data1.xlsx]

## Sheet: Figure 4b
Time (hr)	WT- CYS (mM)						Y157F- CYS (mM)						WT- CSA (mM)			Y157F- CSA (mM)
0	187.579	175.829	173.379				323.307	311.444	330.928				252.609	264.48	282.809	1.401	0.873	1.306
1	228.566	192.399	214.919				268.437	250.99	280.703				380.251	392.55	472.083	1.392	1.394	1.704
2	327.193	327.552	324.916				459.446	470.572	464.957				572.027	575.995	611.345	1.749	1.816	1.962
4	320.036	285.074	284.767				395.849	392.803	395.368				645.935	585.002	615.726	1.563	1.377	1.214
8	223.651	197.609	209.456	253.831	246.972	282.018	383.385	358.135	352.02	385.783	361.557	268.155	431.439	418.425	425.029	1.1	0.997	1.026
24	180.927	186.2	175.487				553.499	451.99	499.552				184.947	251.1	245.114	1.544	1.47	1.755

## Sheet: Figure 4c
Time (hr)	WT- GSH (mM)			Y157F- GSH (mM)			WT - HTAU (mM)			Y157F- HTAU (mM)			WT -TAU (mM)			Y157F- TAU (mM)
0	19.0266	18.3698	18.3182	19.4894	18.5274	19.2141	0.7399	0.6672	0.7273	0.7066	0.5757	0.5765	6.6299	4.3899	5.8819	6.7948	7.2962	5.9419
1	19.9498	18.3599	19.012	19.3016	18.3987	19.0005	0.7993	0.651	0.7875	0.7864	0.5724	0.6936	8.671	7.2498	7.911	8.5397	7.9315	7.5092
2	18.4208	18.8577	19.2764	19.0916	19.0588	19.4381	0.9268	0.8825	0.8832	0.8094	0.8359	0.8416	6.6812	7.5426	5.2759	7.4636	8.1565	7.1034
4	20.8019	20.1478	19.3884	17.8683	17.5171	17.6019	1.0996	0.8868	0.9216	0.6618	0.7501	0.7228	7.3964	8.4636	8.9895	6.3255	7.1801	7.9955
8	20.0252	15.7796	18.4643	20.0715	16.708	15.2164	0.8767	0.5363	0.7856	0.8766	0.7796	0.545	6.6515	6.543	4.7781	6.4253	6.3367	4.4825
24	19.8194	20.4771	18.9937	24.7845	23.4696	24.3689	1.2633	1.3952	1.1932	1.331	1.1081	1.1959	9.0617	7.4438	8.4832	10.4895	11.1169	10.6374

## Sheet: Figure 4d
mM	WT - (CYS)2 (mM)			Y157F - (CYS)2 (mM)			WT - CSA (mM)			Y157F - CSA (mM)
0	171.5	172.9	172	171.5	172.9	172	1.2	0.4	0.3	1.2	0.4	0.3
1	147.7	130.8	140.6	148.5	144.8	150.5	1.5	1.1	1.2	0.8	0.5	0.3
2	133.8	131.3	132.9	137.6	131.1	143.5	2.6	2.3	2.6	0.8	0.7	0.5
4	104.4	112.9	110.9	132.1	136.8	129.1	5.3	3.8	4.2	0.7	0.7	0.8
8	60.6	60.2	65.8	99.1	96.5	97.5	11.3	10	10.1	0.9	0.7	0.7
24	8.1	7.7	7.1	72.7	72.4	72.2	22.6	21.7	22.6	0.7	0.8	0.8

## Sheet: Figure 4e
H1581	sgCON				sgCDO1#1				sgCDO1#2
CSA (mM)	82.6	87.6	90.4	85.6	10.3	10	10.9	11.2	14.9	14.3	15.3	15.8

## Sheet: Figure 4f
H1581	sgCON				sgCDO1#1				sgCDO1#2
Cystine consumption (nmol/hr/ml cells)	2.56683	2.87316	3.68194	3.37787	1.5514	1.80031	1.92532	2.03411	2.38767	1.94041	2.49235	2.45789

## Sheet: Figure 4g
NRF2 KO A549
NRF2:	-														+
CDO1:	Y157F						WT						Y157F						WT
CSA production (nmol/hr/ml cells)	0.058739	0.080066	0.085494	0.020693	0.029544	0.021658	0.079265	0.05154	0.07225	0.070629	0.04592	0.05968	0.012461	0.011557	0.012159	0.01508	0.009633	0.014876	3.50608	3.13292	4.98381	4.27973	3.65765	4.74233

## Sheet: Figure 4h
NRF2 KO A549
NRF2:	-														+
CDO1:	Y157F						WT						Y157F						WT
Cystine consumption (nmol/hr/ml cells)	6.7373	2.757	1.8582	7.1133	8.4905	7.424	2.5894	9.4871	7.4788	7.9539	11.109	9.1102	9.7312	6.7566	8.7201	11.5299	10.6191	11.105	15.1825	16.7444	15.1396	17.7938	18.5345	18.27

## Sheet: Figure 4i
	NRF2:	-						T80K
	CDO1:	Y157F			WT			Y157F			WT
H1299	CSA (mM)	2.2	1.9	1.6	12.8	14.4	14	12.3	11.5	10	164.8	178.5	182.7
H1975	CSA (mM)	0.5	0.4	0.4	3.4	4.3	3.8	1.3	1.2	0.9	236.8	243.2	236.4

## Sheet: Figure 4j
	NRF2:	-						T80K
	CDO1:	Y157F			WT			Y157F			WT
H1299	Cystine consumption (nmol/hr/ml cells)	0.5	0.9	0.5	0.8	-0.1	0.9	1.1	2.2	1.7	2.3	2.5	2.9
H1975	Cystine consumption (nmol/hr/ml cells)	0.6	0.9	0.5	1.2	1.6	1.7	3.1	2.5	2.7	3.7	3.8	4.5

## Sheet: Figure 4k
A549
KEAP1:	C273S						C151S						WT
CDO1:	Y157F			WT			Y157F			WT			Y157F			WT
CSA production (nmol/hr/ml cells)	0.011	0.016	0.012	0.313	0.264	0.301	0.005	0.01	0.009	0.096	0.091	0.069	0.008	0.029	0.011	0.103	0.077	0.086

[truncated: 2 more sheets: Figure 4l, Figure 4m]
