# Supplementary material for: Cysteine dioxygenase 1 is a metabolic liability for non-small cell lung cancer
Source: eLife. 2019 May 20;8:e45572. doi: 10.7554/eLife.45572 (PMC6584702; doi:10.7554/eLife.45572)
Supplement: Figure 5—source data 1. [file elife-45572-fig5-data1.xlsx]

## Sheet: Figure 5a
CDO1:	WT			Y157F
CSA	9.02314	9.29723	9.54965	0.211793	-0.23624	-0.01025
Sulfite	5.06432	5.61527	6.513	0.114023	0.211384	-0.39601
Cysteine	-1.53594	-1.6352	-1.08718	0.437792	-0.80908	0.103967
GSH	-0.59086	-0.30637	-0.37042	0.02942	0.083258	-0.12031

## Sheet: Figure 5c
Time (hr)	CDO1:	WT			Y157F
0	SO32- (mM)	15.6	19.3	17.8	15.6	19.3	17.8
1	SO32- (mM)	21.7	19.2	18.6	15.4	16.2	14.2
2	SO32- (mM)	25.3	19.8	21	14.8	12.1	14.9
4	SO32- (mM)	38.7	28.3	31	14.7	13.5	16.3
8	SO32- (mM)	126.5	110.6	92.8	12.5	13.4	13.1
24	SO32- (mM)	363.8	344.6	344	12.8	13.2	12.7

## Sheet: Figure 5d
Time (hr)	CDO1:	WT			Y157F
0	Cys-SO3- (mM)	0.2	0.3	0.3	0.2	0.3	0.3
1	Cys-SO3- (mM)	7.6	6.3	6.7	0.3	0.3	0.3
2	Cys-SO3- (mM)	12.3	12.7	12	0.3	0.2	0.2
4	Cys-SO3- (mM)	24.8	21.2	23.4	0.2	0.2	0.2
8	Cys-SO3- (mM)	29.7	26.8	29	0.2	0.2	0.2
24	Cys-SO3- (mM)	23.2	24.4	24.4	0.2	0.2	0.2

## Sheet: Figure 5e
Time (min)	Cystine (mM)			Cys-SO3 (mM)
Treatment:	Na2SO3 (1 mM)			Na2SO3 (1 mM)
0	191	198.58	202.82	5.36	4	5.04
5	44.58	46.21	43.05	183.17	187.81	193.47
10	44.2	44.36	44.67	188.3	189.7	199.46
15	46.76	46.66	47.78	199.16	191.81	194.89
30	40.62	42.73	43.11	202.58	217.98	223.84
60	29.3	29.67	25.37	234.09	241.61	236.41

## Sheet: Figure 5f
H1581	sgCON				sgCDO1#1				sgCDO1#2
Cys-SO3 production (nmol/hr/mL cells)	1.72315	1.513	1.67694	1.68098	0.111799	0.10272	0.123631	0.115212	0.168298	0.162829	0.177762	0.158737

## Sheet: Figure 5g
NRF2 KO A549
NRF2	-												+
CDO1:	Y157F						WT						Y157F						WT
Cys-SO3 production (nmol/hr/mL cells)	0.0339	0.0254	0.0222	0.0258	0.0314	0.0306	0.5783	0.4011	0.5078	0.6589	0.4442	0.5458	0.0082	0.0061	0.0276	0.0111	0.0175	0.0114	1.5105	1.19	1.6666	2.0981	1.6946	2.2912

## Sheet: Figure 5h
NRF2:		-						T80K
CDO1		Y157F			WT			Y157F			WT
H1299	Cys-SO3 production (nmol/hr/mL cells)	0	-0.01	0.02	0.02	0.03	0.01	0.01	0.02	0	0.26	0.25	0.23
H1975	Cys-SO3 production (nmol/hr/mL cells)	0.02	0.05	0.03	0.07	0.06	0.06	0.03	0.04	0.02	0.71	0.64	0.68

## Sheet: Figure 5i
A549
KEAP1:	C273S						C151S						WT
CDO1:	Y157F			WT			Y157F			WT			Y157F			WT
Cys-SO3 production (nmol/hr/mL cells)	-0.013	-0.016	-0.031	1.993	1.972	2.008	0.019	-0.008	-0.016	1.102	0.919	0.926	0.019	-0.001	-0.022	1.316	1.196	1.109

## Sheet: Figure 5j
A549
KEAP1:	C273S						C151S						WT
CDO1:	Y157F			WT			Y157F			WT			Y157F			WT
SO32- (mM)	46.6485	50.0327	99.804	844.527	839.769	877.726	114.003	84.0774	64.0311	497.82	570.208	737.019	80.7885	44.2674	71.1452	598.345	600.423	597.067

## Sheet: Figure 5k
H1944
KEAP1:	C273S						C151S						WT
CDO1:	Y157F			WT			Y157F			WT			Y157F			WT
Cys-SO3 production (nmol/hr/mL cells)	-0.036	-0.037	-0.035	2.896	2.981	2.777	-0.013	-0.015	-0.014	1.015	0.96	1.078	-0.021	-0.021	-0.021	1.348	1.372	1.372
