# Supplementary material for: Cysteine dioxygenase 1 is a metabolic liability for non-small cell lung cancer
Source: eLife. 2019 May 20;8:e45572. doi: 10.7554/eLife.45572 (PMC6584702; doi:10.7554/eLife.45572)
Supplement: Figure 6—source data 1. [file elife-45572-fig6-data1.xlsx]

## Sheet: Figure 6b
GOT1			(CYS)2 (2 e.q.)			CSA (1 e.q.)			SO32- (1 e.q.)			CYS-SO3- (1 e.q. from (CYS)2)			CYS-SO3- (1 e.q. from SO32-)
-	Parental A549	Consumption (nmol/hr/mL cells)	23.027	23.567	22.507
		Production (nmol/hr/mL cells)				3.15	3.34	3.35	1.186	1.119	1.397	6.213	6.083	5.653	6.213	6.083	5.653
-	A549 GOT1 KO #1	Consumption (nmol/hr/mL cells)	2.3	5.8	2.4
		Production (nmol/hr/mL cells)				0.44	0.35	0.52	0.252	0.085	0.03	0.24	0.17	0.28	0.24	0.17	0.28
+	A549 GOT1 KO #1	Consumption (nmol/hr/mL cells)	9.2	10.9	10.5
		Production (nmol/hr/mL cells)				0.09	0.08	0.14	0.708	0.722	1.022	2.68	2.47	3.43	2.68	2.47	3.43
-	A549 GOT1 KO #2	Consumption (nmol/hr/mL cells)	9	8.5	8.1
		Production (nmol/hr/mL cells)				2.64	2.07	2.31	0.4	0.578	0.556	2.03	1.57	1.72	2.03	1.57	1.72
+	A549 GOT1 KO #2	Consumption (nmol/hr/mL cells)	14	13.9	14.1
		Production (nmol/hr/mL cells)				2.52	2.17	2.14	1.166	1.233	1.257	5.55	5.04	4.9	5.55	5.04	4.9
-	Parental H460	Consumption (nmol/hr/mL cells)	16.287	12.267	15.807
		Production (nmol/hr/mL cells)				0.69	0.98	0.94	1.923	1.466	1.965	2.577	2.777	2.837	2.577	2.777	2.837
-	H460 GOT1 KO #1	Consumption (nmol/hr/mL cells)	3.9	0.2	0.9
		Production (nmol/hr/mL cells)				1.64	1.59	1.54	0.324	0.887	0.122	0.52	0.51	0.46	0.52	0.51	0.46
+	H460 GOT1 KO #1	Consumption (nmol/hr/mL cells)	12.9	9.9	11.8
		Production (nmol/hr/mL cells)				3.45	2.94	3.17	1.108	1.168	1.387	4.25	3.57	3.76	4.25	3.57	3.76
-	H460 GOT1 KO #2	Consumption (nmol/hr/mL cells)	5.4	7.5	8.2
		Production (nmol/hr/mL cells)				1.55	1.59	1.95	0.295	0.299	0.216	0.59	0.54	0.75	0.59	0.54	0.75
+	H460 GOT1 KO #2	Consumption (nmol/hr/mL cells)	13.8	13.7	18
		Production (nmol/hr/mL cells)				4.1	3.77	4.65	1.199	1.305	1.619	3.53	3.27	3.81	3.53	3.27	3.81

## Sheet: Figure 6c
	GOT1:	Cntl								GOT1
	CDO1:	Y157F				WT				Y157F				WT
Day	1	0.0227	0.0242	0.0251	0.0223	0.0315	0.0257	0.0286	0.0263	0.0383	0.0319	0.0292	0.0316	0.0157	0.02	0.0219	0.02
	2	0.0878	0.0787	0.08	0.0824	0.0538	0.046	0.0431	0.0425	0.101	0.101	0.0808	0.0936	0.0572	0.0556	0.0614	0.0641
	3	0.402	0.398	0.373	0.42	0.168	0.169	0.151	0.154	0.416	0.448	0.415	0.422	0.184	0.193	0.194	0.213

## Sheet: Figure 6d
			A549						H460
GOT1	CDO1		12C2			13C2			12C2			13C2
-	Y157F	GSH (mM)	8.65	9.48	8.77	2.23	2.27	2.28	8.18	9.37	8.73	1.54	1.57	1.77
	WT	GSH (mM)	10.18	9.55	9.31	2.17	1.86	2.02	8.09	8.5	8.29	1.58	1.51	1.69
+	Y157F	GSH (mM)	10.56	10.88	11.14	1.84	1.85	2.01	14.43	14.41	14.61	1.57	1.45	1.63
	WT	GSH (mM)	10.5	10.77	10.83	1.78	1.75	1.84	11.32	12.1	11.91	1.1	1.08	1.17

## Sheet: Figure 6e
			A549			H460
GOT1	CDO1		13C2			13C2
-	Y157F	GSH (mM)	2.23	2.27	2.28	1.54	1.57	1.77
	WT	GSH (mM)	2.17	1.86	2.02	1.58	1.51	1.69
+	Y157F	GSH (mM)	1.84	1.85	2.01	1.57	1.45	1.63
	WT	GSH (mM)	1.78	1.75	1.84	1.1	1.08	1.17

## Sheet: Figure 6f
			A549						H460
GOT1	CDO1		M+0			M+3			M+0			M+3
-	Y157F	CoA peak area/mL cells	2526.65	1426.48	2586.46	175.082	119.687	386.523	13532.9	10464.7	5051.32	896.735	279.312	658.302
	WT	CoA peak area/mL cells	2541.39	2167.96	1943.17	446.641	239.415	0	9090.93	3092.14	7934.85	487.014	266.022	224.56
+	Y157F	CoA peak area/mL cells	1282.12	1619.24	2947.45	580.361	141.537	546.521	9259.79	12720.3	7895.08	1417.77	934.743	1001.46
	WT	CoA peak area/mL cells	2302.38	854.537	1675.03	525.106	68.5232	919.814	16478.3	6851.03	9296.59	1501.91	507.939	758.266

## Sheet: Figure 6g
	A549					H460
GOT1:		-		+			-		+
	Cyclohexamide	Y157F	WT	Y157F	WT	C	Y157F	WT	Y157F	WT
	43.8	711	624	763	817	49.9	472	480	886	484
	67.9	528	626	1510	838	63.7	540	532	843	640
	60.6	410	524	1290	680	56.6	530	490	819	504
	60.4	925	890	677	1080	105	1180	491	764	836
