# Supplementary material for: Cysteine dioxygenase 1 is a metabolic liability for non-small cell lung cancer
Source: eLife. 2019 May 20;8:e45572. doi: 10.7554/eLife.45572 (PMC6584702; doi:10.7554/eLife.45572)
Supplement: Figure 7—figure supplement 1—source data 1. [file elife-45572-fig7-figsupp1-data1.xlsx]

## Sheet: Figure 7 S1A
Cystine:	200 uM	0 uM
relative NADPH/NADP+	1.095	1.292
	0.967	1.181
	0.938	1.254

## Sheet: Figure 7 S1B
CuH2O2 (μM)	sgCon			sgCDO1#1			sgCDO1#2
0	0.985	1.03	0.981	1.01	0.976	1.02	0.977	0.99	1.03
2.5	1.09	0.986	1.03	0.953	0.975	1	0.97	1.06	0.913
5	0.819	0.93	0.97	1.04	0.918	0.961	0.912	0.93	1.12
10	0.184	0.102	0.185	0.489	0.409	0.479	0.545	0.553	0.518
15	0.0393	0.0159	0.0175	0.0324	0.0742	0.162	0.0605	0.114	0.116
20	0.0125	0.0132	0.0122	0.0147	0.0247	0.032	0.0293	0.0219	0.0239
25	0.0142	0.0162	0.0148	0.0307	0.0213	0.0921	0.087	0.0671	0.0425

## Sheet: Figure 7 S1C
Colony number	A549			H1944			H460			HCC15			PC9			H1299
Y157F	227	253	240	1019	921	868	1464	1476	1354	1040	940	703	1680	1799	1892	241	313	314
WT	2	10	3	676	432	389	431	491	313	358	354	292	637	710	706	105	175	177

## Sheet: Figure 7 S1F
A549	(Cys)2 200 μM			(Cys)2 200 μM + Erastin			(Cys)2 10 μM			(Cys)2 200 μM			(Cys)2 200 μM + Erastin			(Cys)2 10 μM
Control	0.0134	0.0255	0.0267	0.0221	0.0276	0.025	0.0225	0.028	0.0357	0.0314	0.0391	0.0465	0.0289	0.0301	0.0403	0.0391	0.0421	0.0521
	0.0272	0.0344	0.0465	0.0447	0.0526	0.0659	0.0603	0.0653	0.0877	0.0671	0.0556	0.0554	0.0892	0.0611	0.0621	0.0714	0.059	0.0532
	0.14	0.187	0.189	0.269	0.305	0.361	0.348	0.363	0.454	0.403	0.348	0.295	0.414	0.356	0.312	0.375	0.309	0.267
GOT1	0.00437	0.0137	0.0169	0.0141	0.0215	0.0311	0.019	0.0252	0.0363	0.0345	0.029	0.0303	0.0303	0.0345	0.0384	0.0358	0.0311	0.0406
	0.0125	0.0183	0.02	0.0437	0.0424	0.0618	0.0411	0.0449	0.0532	0.0737	0.0664	0.06	0.0716	0.0683	0.0545	0.086	0.0627	0.0587
	0.0497	0.0638	0.066	0.279	0.306	0.344	0.206	0.293	0.285	0.451	0.372	0.37	0.348	0.357	0.286	0.306	0.308	0.275
H460	(Cys)2 200 μM			(Cys)2 200 μM + Erastin			(Cys)2 10 μM			(Cys)2 200 μM			(Cys)2 200 μM + Erastin			(Cys)2 10 μM
Control	0.0229	0.0284	0.0276	0.0267	0.0234	0.031	0.0297	0.0357	0.0319	0.0344	0.045	0.0447	0.0344	0.0336	0.0366	0.0366	0.0426	0.0452
	0.0336	0.0384	0.0523	0.0602	0.0492	0.0687	0.0876	0.0821	0.112	0.099	0.0727	0.0728	0.0875	0.0829	0.0649	0.0922	0.0811	0.0776
	0.228	0.193	0.215	0.517	0.536	0.573	0.592	0.65	0.689	0.579	0.549	0.551	0.59	0.531	0.548	0.572	0.576	0.484
GOT1	0.0223	0.0311	0.0499	0.0401	0.041	0.055	0.0418	0.0467	0.0508	0.0553	0.0452	0.0495	0.061	0.05	0.0598	0.0523	0.0501	0.0633
	0.028	0.0284	0.0242	0.113	0.0983	0.137	0.107	0.0819	0.0973	0.129	0.115	0.119	0.116	0.0946	0.137	0.136	0.152	0.17
	0.0538	0.0562	0.0561	0.721	0.68	0.831	0.608	0.603	0.653	0.681	0.67	0.703	0.763	0.712	0.745	0.647	0.741	0.731
