# Supplementary material for: Cysteine dioxygenase 1 is a metabolic liability for non-small cell lung cancer
Source: eLife. 2019 May 20;8:e45572. doi: 10.7554/eLife.45572 (PMC6584702; doi:10.7554/eLife.45572)
Supplement: Figure 7—source data 1. [file elife-45572-fig7-data1.xlsx]

## Sheet: Figure 7a
	A549				H460
GOT1:	-		+		-		+
CDO1:	Y157F	WT	Y157F	WT	Y157F	WT	Y157F	WT
Relative NADPH/NADP+	1.02	0.808	1.02	0.797	1.04	0.71	1.05	0.63
	0.983	0.811	1.01	0.753	0.98	0.7	0.96	0.65
	1	0.773	0.969	0.751	0.98	0.71	0.99	0.63

## Sheet: Figure 7b
	A549						H1944						H460
	Y157F			WT			Y157F			WT			Y157F			WT
GSH (mM)	20.86	21.15	21.08	19.76	19.31	19.68	11.8	11.81	11.24	10.4	10.59	10.36	12.4	13.21	12.58	12.14	12.72	12.35
GSSG (mM)	0.03	0.02	0.03	0.02	0.02	0.02	0.01	0.02	0.02	0.01	0.01	0.01	0.03	0.05	0.04	0.02	0.03	0.02

## Sheet: Figure 7c
	GOT1 KO A549													GOT1 KO H460
GOT1:	-						+						GOT1:	-						+
CuH2O2 (mM)	CDO1WT			CDO1Y157F			CDO1WT			CDO1Y157F			CuH2O2 (mM)	CDO1WT			CDO1Y157F			CDO1WT			CDO1Y157F
0	0.933509	1.04278	1.02371	0.936347	1.09261	0.971038	0.82575	1.07534	1.09891	1.03617	0.962285	1.00154	0.79	1.07	1.14	1.05	0.921	1.03	0.944	0.98	1.08	0.97	1.03	0.999
5	1.15549	1.34303	1.29965	1.19091	1.17752	1.14475	0.990261	1.37137	1.13194	1.15874	1.03617	1.0258	0.983	1.03	0.986	1.03	1.04	0.926	1.02	1.12	1.14	0.961	0.973	1.03
7.5													0.857	1.03	0.833	0.922	0.979	0.962	1.06	1.09	1.18	0.911	0.988	1.08
10	0.905813	1.1233	1.04008	1.1198	1.20014	1.13831	0.924742	1.1583	1.22216	1.09392	1.02184	1.09907	0.513	0.744	0.963	1.01	0.908	0.931	0.762	0.978	1.09	1.13	1.04	1.12
12.5	0.26404	0.582154	0.486803	1.10782	1.07624	0.931997	0.809402	1.04559	0.997118	1.20119	0.977681	1.06471	0.304	0.452	0.593	0.896	1.04	0.871	0.413	0.327	0.484	0.966	1.07	1
15	0.274334	0.260147	0.203042	0.382073	0.487538	0.464104	0.659542	0.941049	0.773719	0.96475	1.09164	1.08483	0.14	0.146	0.272	0.611	0.803	0.63	0.0778	0.132	0.182	0.873	0.966	0.892
17.5	0.185029	0.078017	0.100716	0.157989	0.239397	0.251689	0.47117	0.58355	0.635715	1.02739	1.01346	1.02105	0.112	0.103	0.108	0.301	0.285	0.494	0.0367	0.0677	0.0835	0.654	0.856	0.718
20	0.09214	0.083622	0.081377	0.119127	0.10228	0.210129	0.342952	0.274244	0.33555	0.716881	0.808285	0.860951	0.0836	0.071	0.0868	0.142	0.17	0.212	0.0389	0.0756	0.0903	0.449	0.376	0.425
25	0.046364	0.085996	0.105917	0.08227	0.106326	0.092006	0.110516	0.10908	0.13161	0.420374	0.226366	0.340435	0.0868	0.0553	0.114	0.0848	0.0838	0.0618	0.0422	0.0983	0.0722	0.157	0.192	0.207

## Sheet: Figure 7d
	A549				H460
GOT1:	-		+		-		+
CDO1:	Y157F	WT	Y157F	WT	Y157F	WT	Y157F	WT
Relative Proline (M+5)/Glutamate (M+5)	0.933949	0.538299	0.939615	0.641635	0.925546	0.608916	0.885368	0.456795
	1.04566	0.679918	1.03111	0.740842	1.06084	0.583636	1.06401	0.554462
	1.02039	0.706005	1.02928	0.75036	1.01362	0.569171	1.05062	0.491297

## Sheet: Figure 7e
GOT1 KO A549		Y157F			WT
Control	M+0	0.0779	0.06474	0.07268	0.09996	0.09507	0.10257
	M+1	0.00542	0.00651	0.00276	0.00745	0.01312	0.00859
	M+2	0.03527	0.03898	0.03806	0.06069	0.05514	0.05819
	M+3	0.11063	0.10816	0.11594	0.13015	0.13592	0.13706
	M+4	0.27652	0.28642	0.28929	0.37528	0.38008	0.38672
	M+5	0.45265	0.43811	0.44045	0.29612	0.29852	0.28025
	M+6	0.04161	0.05708	0.0408	0.03034	0.02215	0.02663
GOT1	M+0	0.0809	0.07987	0.08395	0.26751	0.26573	0.26765
	M+1	0.01346	0.0131	0.01379	0.01245	0.01304	0.01741
	M+2	0.06933	0.07182	0.07148	0.08108	0.07993	0.08293
	M+3	0.1476	0.14476	0.14679	0.11184	0.11248	0.11153
	M+4	0.34662	0.35248	0.36336	0.36351	0.36459	0.36921
	M+5	0.31287	0.30544	0.2922	0.15721	0.14882	0.14192
	M+6	0.02922	0.03252	0.02844	0.00641	0.01542	0.00934

## Sheet: Figure 7f
GOT1 KO H460		Y157F			WT
Control	M+0	0.15193	0.15483	0.15726	0.20495	0.20902	0.19491
	M+1	0.00446	0.00408	0.00408	0.00607	0.0039	0.00667
	M+2	0.04477	0.04327	0.04299	0.04998	0.05148	0.05113
	M+3	0.11589	0.11767	0.11836	0.06518	0.06644	0.07194
	M+4	0.49172	0.48865	0.48956	0.62416	0.61655	0.61449
	M+5	0.15462	0.15495	0.15177	0.04132	0.04285	0.0482
	M+6	0.03662	0.03656	0.03598	0.00833	0.00974	0.01266
GOT1	M+0	0.21212	0.21584	0.22242	0.31667	0.31604	0.3186
	M+1	0.0133	0.01261	0.01106	0.00984	0.00914	0.00952
	M+2	0.07898	0.07976	0.07868	0.07048	0.07116	0.06914
	M+3	0.13973	0.13837	0.13829	0.09299	0.09465	0.09483
	M+4	0.43465	0.43676	0.42911	0.44976	0.44766	0.44763
	M+5	0.10936	0.10371	0.10789	0.0507	0.05219	0.04897
	M+6	0.01186	0.01296	0.01255	0.00955	0.00917	0.01129
