# Supplementary material for: Cysteine dioxygenase 1 is a metabolic liability for non-small cell lung cancer
Source: eLife. 2019 May 20;8:e45572. doi: 10.7554/eLife.45572 (PMC6584702; doi:10.7554/eLife.45572)
Supplement: Figure 8—source data 1. [file elife-45572-fig8-data1.xlsx]

## Sheet: Figure 8a
Mouse ID	Survival post-cre (Days)	R554Q/R554Q	R554Q/WT	WT/WT	R554Q/WT	WT/WT	R554Q/R554Q
2255	108	1
2256	108	1
2296	468					0
2297	468				0
2298	468						0
2299	468				0
2300	108	1
2301	108	1
2302	119			1
2303	119			1
2304	137		1
2305	468				0
2306	468				0
2325	434				0
2326	109		1
2327	434						0
2328	114			1
2329	434					0
2370	434						0
2371	331					1
2372	434						0
2395	140			1
2398	434						0
2401	109			1
2424	107			1
2427	434						0
2444	406						0
2445	406					0
2446	98		1
2449	94	1
2450	105	1
2451	112		1
2454	86		1
2457	112		1
2458	406						0
2459	136	1
2460	136		1
2461	84		1
2462	406						0
2463	406				0
2464	112	1
2514	112		1
2515	406						0
2516	105	1
2517	98		1
2518	98		1
2525	406						0
2526	170	1
2527	406					0
2532	406					0
2533	86			1
2571	107			1
2572	70	1
2574	377						0
2593	113			1
2610	377						0
2661	126			1
2663	345					0
2664	87	1
2666	377					0
2667	90			1
2670	70	1
2671	104	1
2672	107			1
2673	107			1
2675	107	1
2678	106	1
2679	106			1
2682	104			1
2722	107			1
2724	107	1
2725	349						0
2726	349						0
2727	129	1
2774	90			1
2775	90	1
2780	188	1
2811	106	1
2813	105	1
2814	317						1
2815	141			1
2816	349					0
2839	98			1
2841	349						0
2846	98	1
2847	93	1
2849	349					0
2850	349						0

## Sheet: Figure 8c
WT/WT	R554Q/WT	R554Q/R554Q
0.901336	0.606287	0.211393
0.900646	0.757342	0.23653
0.669538	1.5645	0.0983689
0.47355	0.85159	0.132101
0.872601	1.01821	0.242013
0.588976	0.741457	0.156495
0.647918	0.7317	0.236267
0.460966	0.818001	0.143665
0.584055		0.097714
0.428442		0.159055

## Sheet: Figure 8d
WT/WT	R554Q/WT	R554Q/R554Q
0.313131	0.385827	2.60408
0.243478	0.571429	2.63953
0.322368	0.587838	1.75591
0.112426	0.744186	2.11712
0.247191	0.533333	2.66316
0.263158	0.544715	2.0327
0.140351		2.36585
0.366197		2.25758
0.247059		2.48529
0.404255		2.49408
