# Supplementary material for: Cysteine dioxygenase 1 is a metabolic liability for non-small cell lung cancer
Source: eLife journal article supplement (doi:10.7554/elife.45572), 2019-05-20
Supplement: supp [file elife_poa_e45572_Figure_3_source_data_2.xlsx]

## Sheet: Fig 3 S1B
CDO1 methylation	CDO1 mRNA
0.03	91.8
0.04	24.6
0.08	24.9
0.1	3.1
0.11	145.1
0.11	35.8
0.13	46
0.13	5.5
0.13	22.2
0.16	4.6
0.19	36.9
0.21	79.4
0.23	46.8
0.26	48.2
0.26	65.6
0.26	27.6
0.27	52.8
0.27	76.3
0.27	108.2
0.28	78.9
0.28	63.1
0.28	17.1
0.28	50.8
0.28	42.7
0.28	16.3
0.29	90.3
0.29	26
0.29	77.7
0.29	34.1
0.3	12.2
0.31	6.4
0.32	3.1
0.33	30.2
0.33	13.3
0.33	49.6
0.34	38.1
0.34	28.8
0.34	14.3
0.34	23.1
0.35	75.4
0.35	26.4
0.35	26.2
0.35	34.4
0.36	59.7
0.36	63.2
0.36	38.1
0.36	25.3
0.36	4.6
0.37	28.4
0.37	41.1
0.37	77.7
0.38	48.8
0.38	17.5
0.38	26.3
0.38	25.7
0.38	71
0.38	24
0.39	62.4
0.39	34
0.39	57.9
0.4	10
0.4	72.1
0.4	5.9
0.4	32
0.4	64.5
0.4	49.4
0.4	173.3
0.4	27.7
0.41	19.1
0.41	20.4
0.41	44.6
0.41	43.9
0.41	26
0.41	52.4
0.41	49
0.41	49.8
0.42	6.9
0.42	92
0.42	44.7
0.42	8.9
0.43	58.5
0.43	22.5
0.43	67.7
0.43	115.2
0.43	11.7
0.43	23.4
0.43	54.3
0.44	27.2
0.44	29.5
0.44	45.4
0.44	62.3
0.44	15
0.44	10
0.44	39.1
0.45	14.5
0.45	43
0.45	19.5
0.45	10.7
0.45	13.3
0.45	24.4
0.46	50.3
0.46	26.9
0.46	7.4
0.46	20.2
0.46	43.2
0.46	16.8
0.47	43.6
0.47	10.2
0.48	42.3
0.48	1.7
0.48	25.4
0.48	8.3
0.48	21.1
0.48	20.5
0.48	15.5
0.48	22
0.49	63.3
0.49	16.6
0.49	27.5
0.49	6.9
0.49	39.2
0.49	31.5
0.49	28.8
0.49	16.4
0.49	5.9
0.5	34.3
0.5	20.4
0.5	22.4
0.5	2.9
0.5	6.4
0.5	20.7
0.5	6.6
0.51	12.9
0.51	13.1
0.51	14.3
0.52	17.8
0.52	7
0.52	19
0.52	5.7
0.53	10
0.54	19.8
0.54	12.6
0.54	66.7
0.54	35.4
0.54	10.1
0.55	21.1
0.55	6
0.55	43.2
0.55	12.5
0.55	31.5
0.55	40.5
0.56	15.2
0.56	50.4
0.56	14.2
0.57	1.4
0.57	4.7
0.58	12.9
0.58	22.6
0.59	36.4
0.59	14.3
0.59	12.2
0.59	6.2
0.59	36.9
0.59	11.7
0.6	5.9
0.6	10.6
0.6	9.3
0.6	19.1
0.6	9
0.6	21.7
0.61	10.8
0.61	4
0.61	15.1
0.62	48.9
0.62	5.3
0.62	9.7
0.62	14.7
0.64	109.2
0.64	15.7
0.64	10.8
0.65	6.8
0.66	16.2
0.7	6.2
0.71	16.2
0.78	1

## Sheet: Fig 3 S1C
Normal	NRF2 HIGH	NRF2 LOW
0.1642	0.626947	0.485578
0.1464	0.58566	0.307276
0.1676	0.561078	0.445119
0.1602	0.367735	0.549529
0.1677	0.512872	0.34822
0.165	0.520916	0.433696
0.1463	0.428993	0.270824
0.1526	0.404997	0.523612
0.1749	0.541429	0.697855
0.1699	0.0671282	0.633985
0.1788	0.368338	0.13306
0.1468	0.444221	0.405942
0.1535	0.358881	0.081475
0.1691	0.591954	0.517609
0.17	0.575511	0.40638
0.169	0.318929	0.160722
0.1685	0.494723	0.27801
0.1531	0.493965	0.479365
0.1651	0.445963	0.5947
0.1628	0.508107	0.432168
0.1557	0.450131	0.477199
0.1536	0.631182	0.107728
0.1524	0.591904	0.608348
0.1617	0.449662	0.49767
0.179	0.544514	0.388882
0.1596	0.559107	0.595877
0.1668	0.450787	0.513705
0.1724	0.612162	0.34233
	0.685687	0.393461
	0.447955	0.293387
	0.39381	0.162168
	0.300604	0.485264
	0.587013	0.345224
	0.434926	0.465086
	0.501643	0.588819
	0.50416	0.554196
	0.545232	0.359477
	0.604355	0.627929
	0.495974	0.458673
	0.559384	0.417111
	0.607091	0.439319
	0.599555	0.288145
	0.405159	0.405303
	0.403281	0.390849
	0.284295	0.616938
	0.45433	0.431341
	0.402775	0.15302
	0.368113	0.358316
	0.477553	0.572042
	0.298691	0.529104
	0.395438	0.499012
		0.335952
		0.402817
		0.563684
		0.29973
		0.380426
		0.583184
		0.498995
		0.404916
		0.306444
		0.597811
		0.485388
		0.135074
		0.549129
		0.376999
		0.432437
		0.555224
		0.277712
		0.495303
		0.53695
		0.589078
		0.41853
		0.383613
		0.542603
		0.212356
		0.436188
		0.417104
		0.462072
		0.295311
		0.59489
		0.228757
		0.318456
		0.420134
		0.463768
		0.502977
		0.58723
		0.489154
		0.516133
		0.428634
		0.357893
		0.35568
		0.467291
		0.399431
		0.753223
		0.544981
		0.652429
		0.455809
		0.419285
		0.485124
		0.496434
		0.36576
		0.29403
		0.476823
		0.569354
		0.406318
		0.492553
		0.417385
		0.305278
		0.61027
		0.298202
		0.176769
		0.431316
		0.433164
		0.349611
		0.386582
		0.48595
		0.377919
		0.135473
		0.5225
		0.418727
		0.385537
		0.467014
		0.549481
		0.449453
		0.486714
		0.349174
		0.47859
		0.487285
		0.254577
		0.454398
		0.437121
		0.487759
		0.444653
		0.53733

## Sheet: Fig 3 S1D
	A549			H1792			H1944			H2009			PC9			H1581			H1975			H1993			H441			H460			HCC15			H1299			H2172			H2347			H322
DMSO	6.95222e-05	4.29345e-06	3.39724e-05	0.000358788	0.000174083	0.000183682	3.49449e-05	8.8513e-05	2.90931e-06	0.000452234	0.000376738	0.000234782	3.22056e-06	3.18017e-06	4.68238e-06	0.554166	0.557499	0.698334	2.4871e-06	2.77764e-06	3.61646e-06	0.000358586	5.59599e-05	0.000230658	0.00058417	0.000659351	0.000185685	0.00029652	1.14266e-05	1.11522e-05	0.000347666	0.00124397	0.00163146	0.137889	0.116463	0.240799	0.000251031	0.000259971	4.39897e-05	0.000911519	0.00151596	0.000347269	0.000142186	0.000732788	0.00093794
Decitabine	0.000257	0.000238	0.0004	0.00460997	0.00667596	0.00422884	0.0525089	0.0475358	0.0438931	0.0160164	0.0212513	0.0275348	0.00614531	0.00733977	0.00655138	1	1.18447	1.21814	0.0144615	0.0181451	0.0195695	0.0149026	0.0152	0.0184099	0.040167	0.0389322	0.0387746	0.00100482	0.00148315	0.00129951	0.00472398	0.0031077	0.00429332	0.833635	0.72562	0.679232	0.00280419	0.00270652	0.003948	0.0230103	0.0242802	0.0212653	0.0173871	0.0179021	0.0193238

## Sheet: Fig 3 S2A
CDO1/aTub	CDO1 mRNA
0.003477	13.1
0.422793	10.4
0.055573	31.3
0.774241	84.4
0.943011	28.2
0.640887	24.3
0.750481	13.8
0.313649	3.9
0.108652	11.9
0.998707	5.6
2.38177	38.4
1.84852	14.3
2.07206	30.1

## Sheet: Fig 3 S3B
	H460						H1299												H1975
bLap:							-						+						-						+
CDO1:	Y157			WT			Y157			WT			Y157F			WT			Y157F			WT			Y157F			WT
CYS (mM)	1.58518	1.61655	1.59642	0.457582	0.604892	0.473605	0.135703	0.125348	0.12652	0.0930917	0.1112	0.107712	0.240661	0.238426	0.229381	0.194303	0.175912	0.210567	0.151028	0.146348	0.152152	0.194277	0.199969	0.191413	0.923043	0.845404	1.00268	0.43421	0.426013	0.463827

## Sheet: Fig 3 S3D
	Y157F			WT
H1299	0.989473	0.989189	1.02134	0.923979	1.13442	1.19514
H2087	0.958591	1.13171	0.909701	0.904579	1.2365	1.10647
H1975	1.00615	0.950769	1.04308	0.96	0.969231	0.996923
H441	1.03528	0.936685	1.02803	0.577458	0.522253	0.613389
H2009	1.00292	1.07841	0.918664	0.624415	0.737391	0.571021
H2347	0.924611	1.00776	1.06763	0.717712	0.762844	0.451923
H1993	1.03399	0.971648	0.994364	1.03803	0.968981	0.992356
H1792	1.03101	0.907602	1.06139	1.44412	1.15411	1.12145
HCC15	1.01305	1.0072	0.979752	1.08592	1.05354	0.958673
A549	0.947013	0.987616	1.06537	0.675547	0.734352	0.715073
H322	1.01056	0.974129	1.01531	0.739704	0.731785	0.777719
PC9	0.879597	1.06583	1.05457	0.363641	0.373728	0.344029
H460	1.00143	1.01869	0.979884	0.382608	0.379136	0.275977

## Sheet: Fig 3 S3E
	CDO1 mRNA	Growth Inhibition (%)
H1299	13.1	-8.45137
H1975	31.3	2.46154
HCC15	11.9	-3.2711
H1792	3.9	-23.9894
H2087	10.4	-8.25142
H2347	24.3	35.584
H1993	13.8	0.021009
H441	84.4	42.8967
H2009	28.2	35.5724
A549	5.6	29.1676
PC9	14.3	63.9534
H460	30.1	65.4093
H322	38.4	25.0264
