# Supplementary material for: Cysteine dioxygenase 1 is a metabolic liability for non-small cell lung cancer
Source: eLife journal article supplement (doi:10.7554/elife.45572), 2019-05-20
Supplement: supp [file elife_poa_e45572_Figure_5_source_data_2.xlsx]

## Sheet: Figure 5 S1B
Time (min)	Cystine (mM)			Cys-SO3 (mM)
Treatment:	CSA (1mM)			CSA (1mM)
0	191	198.58	202.82	5.36	4	5.04
5	196.49	215.8	208.62	4.2	4.07	3.67
10	207.14	212.88	195.67	4.05	3.91	3.36
15	202.74	220.48	194.01	4.55	4.26	4.02
30	209.6	195.43	213.48	4.51	4.34	4.58
60	215.14	209.98	206.37	4.86	4.68	4.83

## Sheet: Figure 5 S1C
Time (min)	Cystine			Cys-SO3
Treatment:	Na2SO3 (1mM)			Na2SO3 (1mM)
0	0.941768	1.02536	1.03288	0.00925994	0.00263654	0.00233938
5	0.200202	0.200783	0.198266	0.975792	1.01928	1.00803
10	0.196628	0.187707	0.189541	1.06381	1.08712	1.09753
15	0.190145	0.171674	0.17038	1.12695	1.0532	0.996876
30	0.157741	0.155681	0.159104	1.02247	0.983797	0.993735

## Sheet: Figure 5 S1D
Time (min)	GSSG (mM)			GS-SO3 (mM)
Treatment:	Na2SO3 (1mM)			Na2SO3 (1mM)
0	1.045	0.975	0.98	0.008111	0.000704	0.000501
5	0.307	0.295	0.289	0.970941	0.969066	0.924041
10	0.249	0.254	0.255	0.988699	1.01227	0.948655
15	0.245	0.239	0.234	0.991776	1.02272	0.94249
30	0.233	0.23	0.223	1.0083	1.03723	0.954462

## Sheet: Figure 5 S1E
	Cystine (mM)			GSSG (mM)
	Blank	Y157F	WT	Blank	Y157F	WT
Media concentration	182.092	118.443	40.5997	0.0272069	0.0398192	0.290265
	189.566	111.551	49.8964	0.0179759	0.397591	0.0845049
	187.538	117.561	43.7786	0.0181329	0.104585	0.130349

## Sheet: Figure 5 S1F
	Cystine (mM)		GSSG (mM)
	Y157F	WT	Y157F	WT
Cell concentration	235	235	40	19
	237	241	39	23
	183	174	34	16

## Sheet: Figure 5 S2B
		KEAP1
CDO1		WT			R554Q
Y157F	Cystine (mM)	0.73	0.68	0.77	0.9	0.71	0.64
WT	Cystine (mM)	1.09	0.72	0.79	0.71	0.66	0.73

## Sheet: Figure 5 S2C
		KEAP1
CDO1		WT			R554Q
Y157F	Cysteine (mM)	0.02	0.02	0.02	0.14	0.13	0.15
WT	Cysteine (mM)	0.02	0.02	0.02	0.06	0.06	0.08

## Sheet: Figure 5 S2D
		KEAP1
CDO1		WT			R554Q
Y157F	GSH (mM)	2.35	2.34	2.24	7.76	8.01	8.77
WT	GSH (mM)	2.36	2.33	2.4	6.58	6.27	6.98

## Sheet: Figure 5 S2E
		KEAP1
CDO1		WT			R554Q
Y157F	CSA (mM)	0.008183	0.005557	0.008664	0.035044	0.037693	0.025849
WT	CSA (mM)	0.012787	0.014661	0.009882	0.138547	0.139511	0.128899

## Sheet: Figure 5 S2F
		KEAP1
CDO1		WT			R554Q
Y157F	HTAU (mM)	0.44	0.37	0.31	1.35	1.27	1.38
WT	HTAU (mM)	0.41	0.44	0.61	2	1.63	2

[truncated: 15 more sheets: Figure 5 S2G, Figure 5 S3B, Figure 5 S3C, Figure 5 S3D, Figure 5 S3E, Figure 5 S3F, Figure 5 S3G, Figure 5 S3H, Figure 5 S3I, Figure 5 S3J, Figure 5 S4A, Figure 5 S4B, Figure 5 S4C, Figure 5 S4D, Figure 5 S4E]
