# Supplementary figures and images for: Cysteine dioxygenase 1 is a metabolic liability for non-small cell lung cancer
Source: eLife journal article supplement (doi:10.7554/elife.45572), 2019-05-20

**a**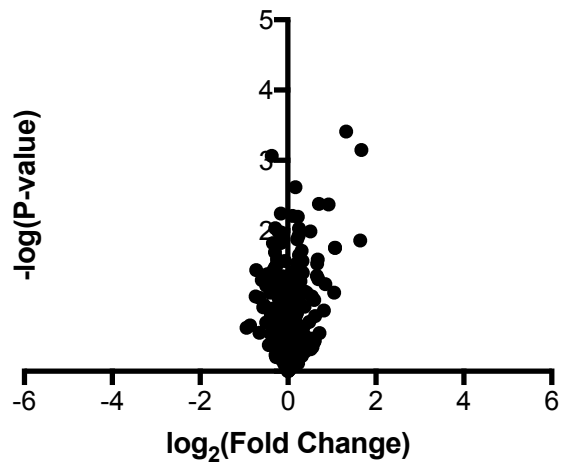**b**

152m/z → 88m/z

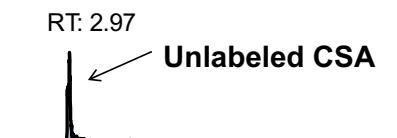

156 m/z → 92m/z

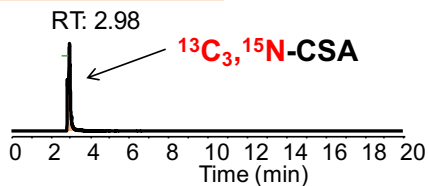RT: 3.4  
Cystine

241m/z → 74m/z

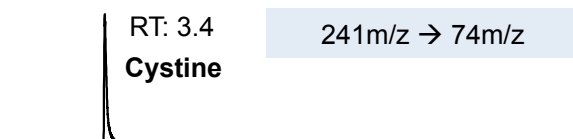

RT: 3.4

249 m/z → 77m/z

<sup>13</sup>C<sub>6</sub>, <sup>15</sup>N<sub>2</sub>-Cystine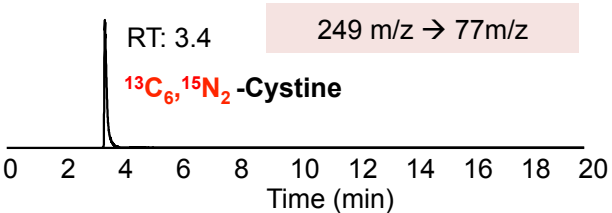**Figure 1 - supplement 1**

Supplement: supp [file elife_poa_e45572_Figure_1_figure_supplement_1.pdf › elife_poa_e45572_Figure_1_figure_supplement_1.pdf]

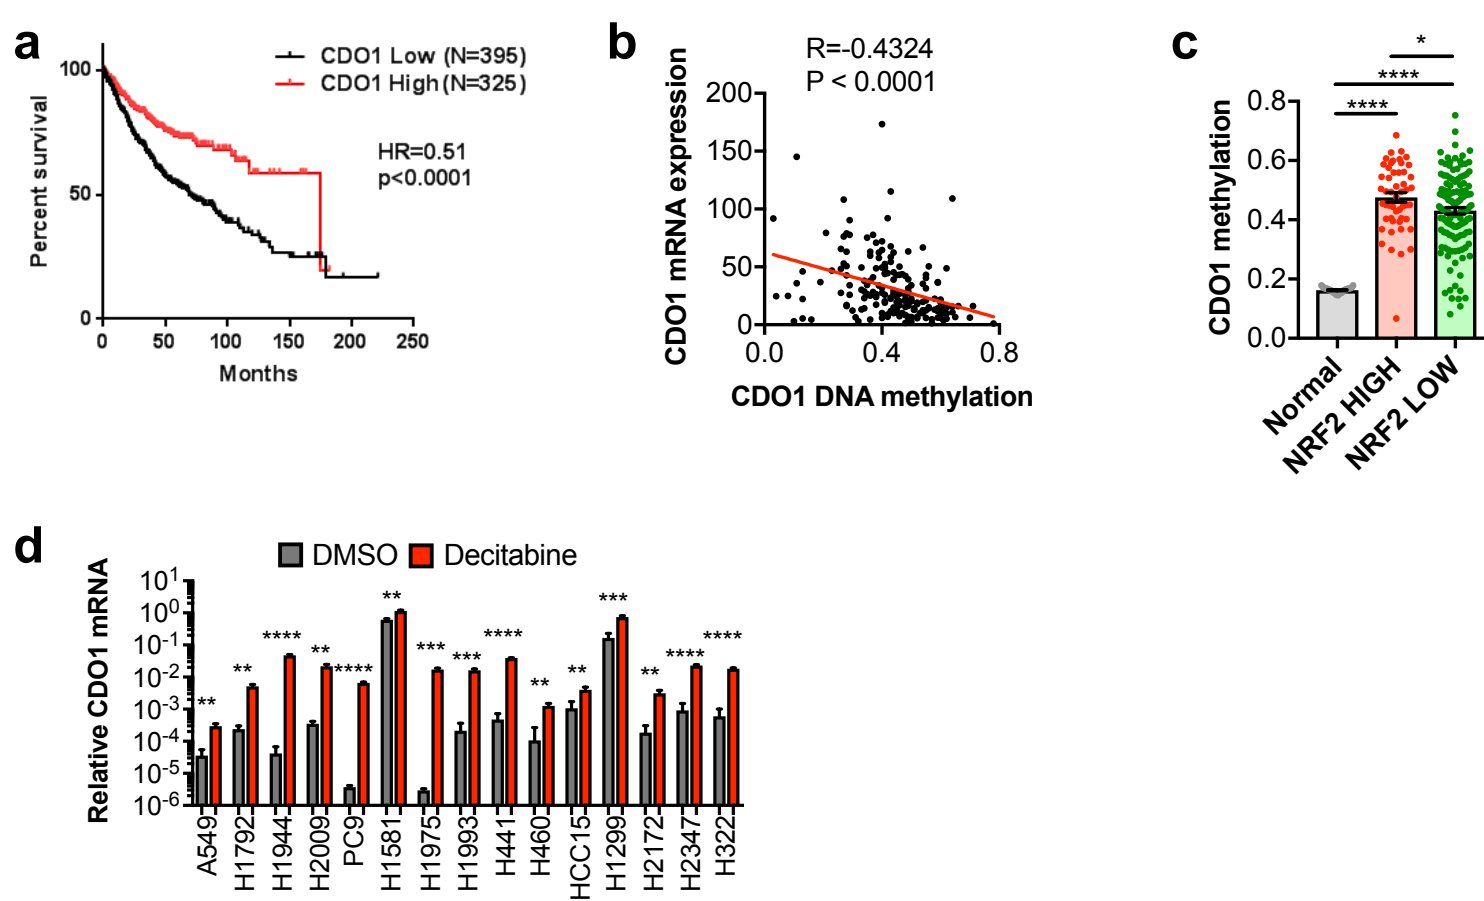

Figure 3 - supplement 1

Supplement: supp [file elife_poa_e45572_Figure_3_figure_supplement_1.pdf › elife_poa_e45572_Figure_3_figure_supplement_1.pdf]

**a**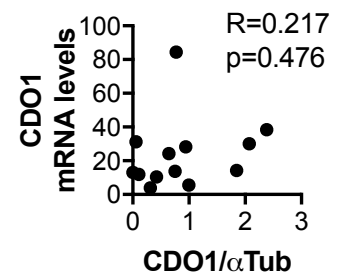**b**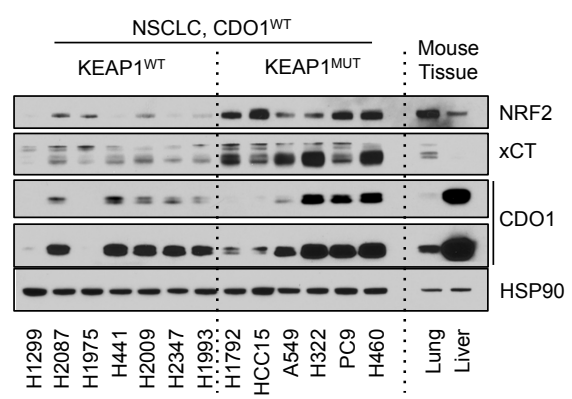**Figure 3 - supplement 2**

Supplement: supp [file elife_poa_e45572_Figure_3_figure_supplement_2.pdf › elife_poa_e45572_Figure_3_figure_supplement_2.pdf]

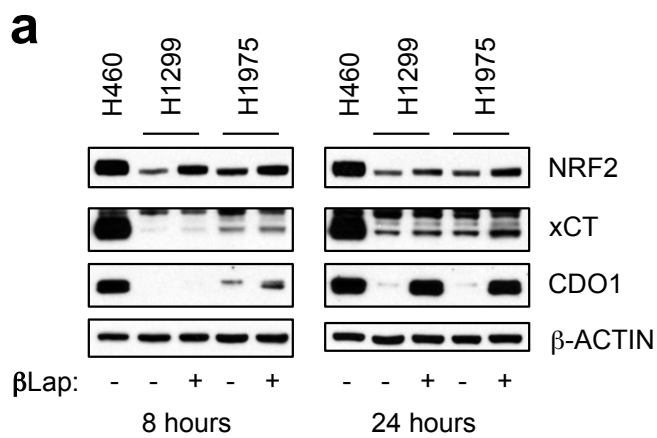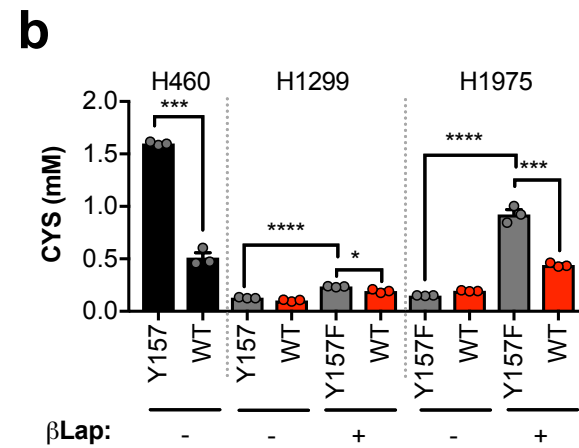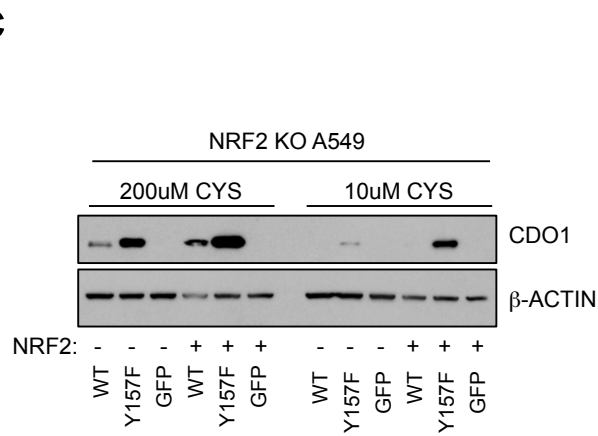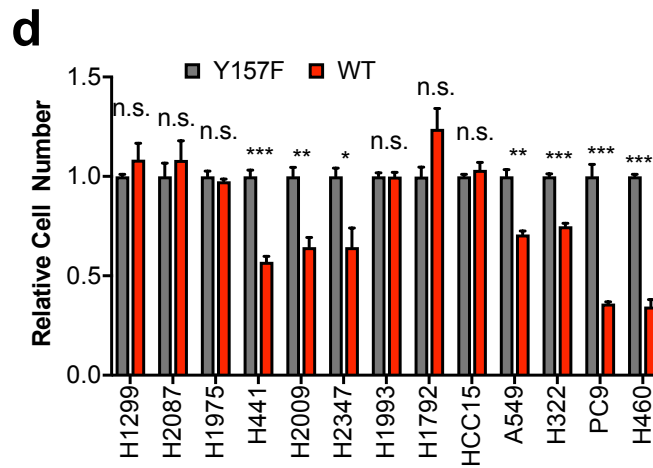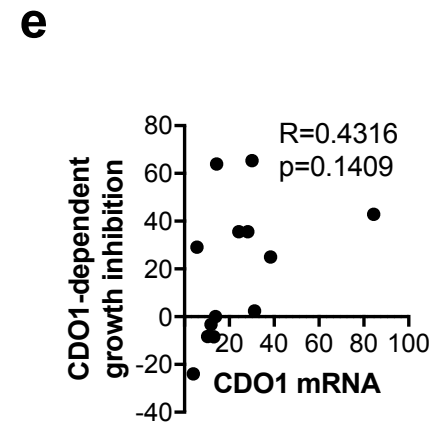

Figure 3 - supplement 3

Supplement: supp [file elife_poa_e45572_Figure_3_figure_supplement_3.pdf › elife_poa_e45572_Figure_3_figure_supplement_3.pdf]

**a**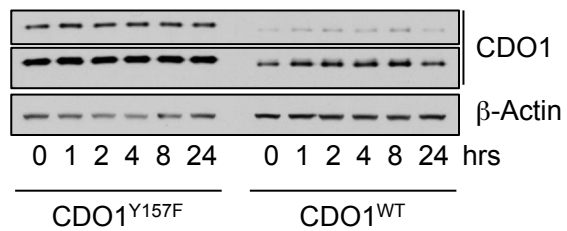**b**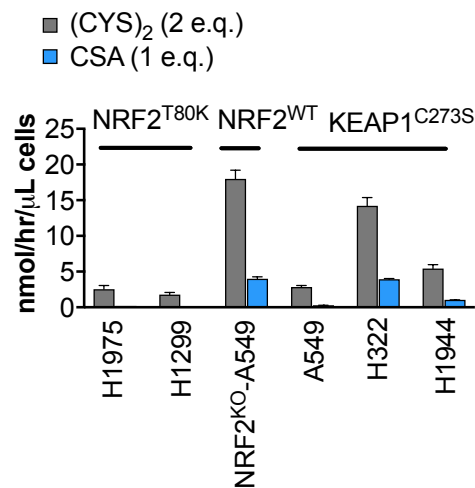**Figure 4 - supplement 1**

Supplement: supp [file elife_poa_e45572_Figure_4_figure_supplement_1.pdf › elife_poa_e45572_Figure_4_figure_supplement_1.pdf]

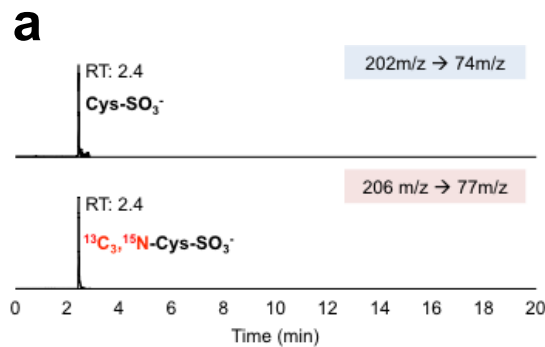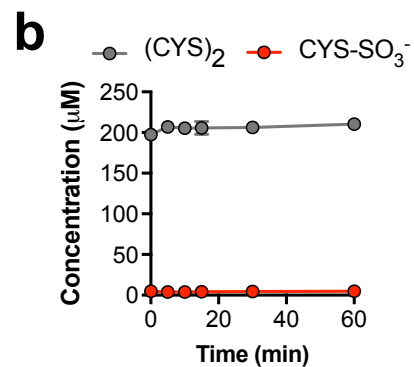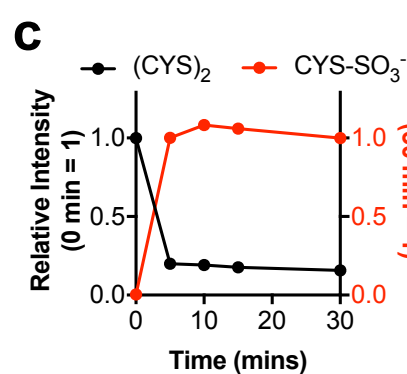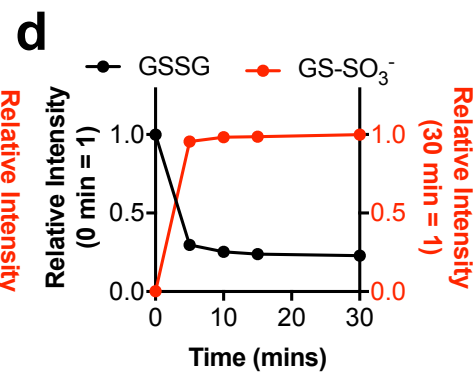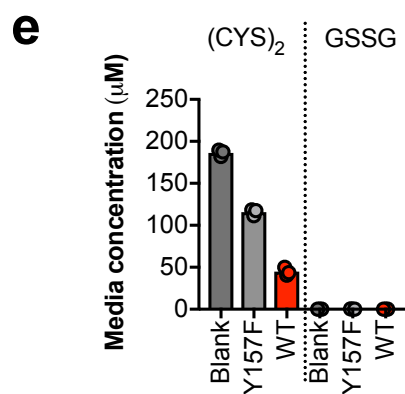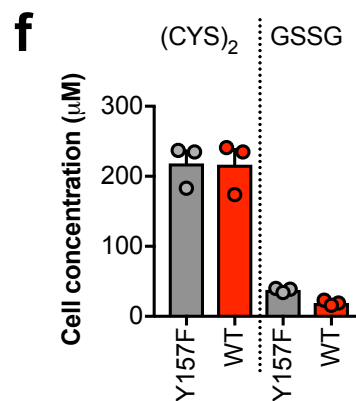

Figure 5 supplement 1

Supplement: supp [file elife_poa_e45572_Figure_5_figure_supplement_1.pdf › elife_poa_e45572_Figure_5_figure_supplement_1.pdf]

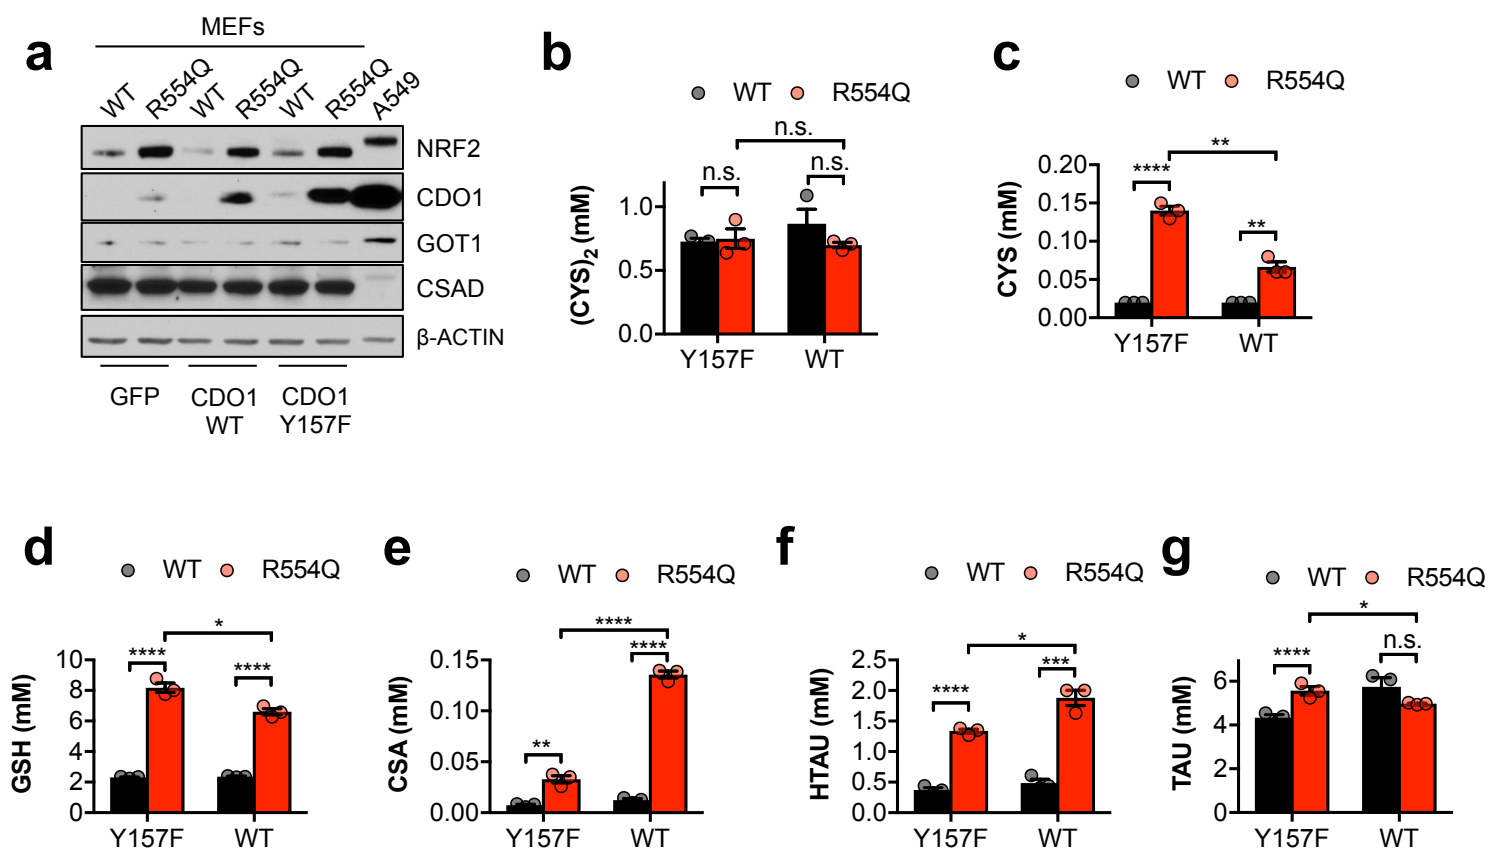

Figure 5 supplement 2

Supplement: supp [file elife_poa_e45572_Figure_5_figure_supplement_2.pdf › elife_poa_e45572_Figure_5_figure_supplement_2.pdf]

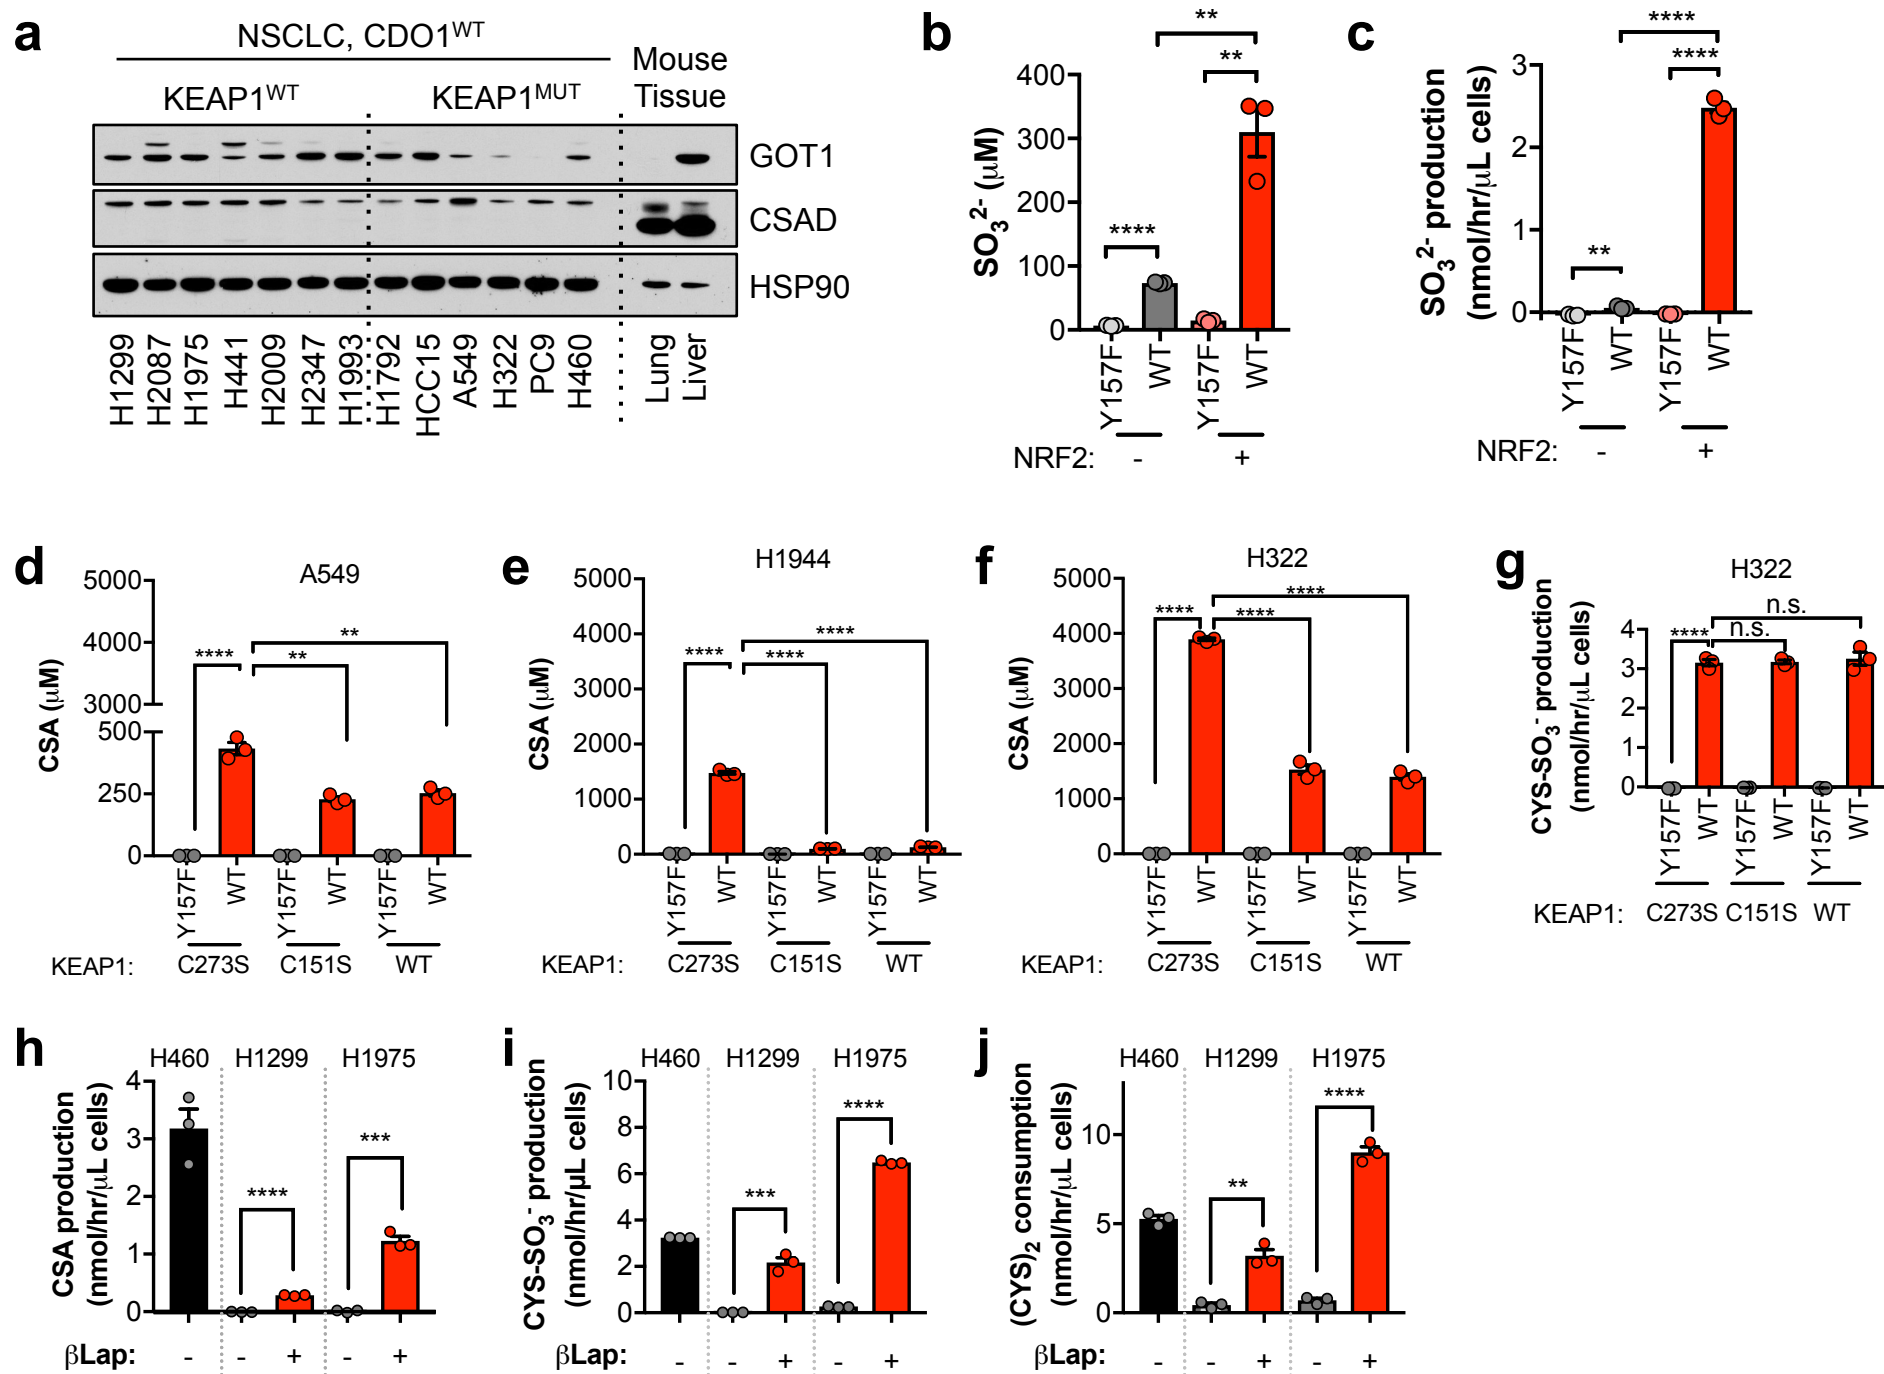

Figure 5 supplement 3

Supplement: supp [file elife_poa_e45572_Figure_5_figure_supplement_3.pdf › elife_poa_e45572_Figure_5_figure_supplement_3.pdf]

**a**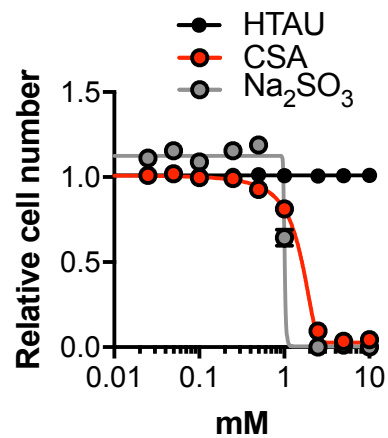**b**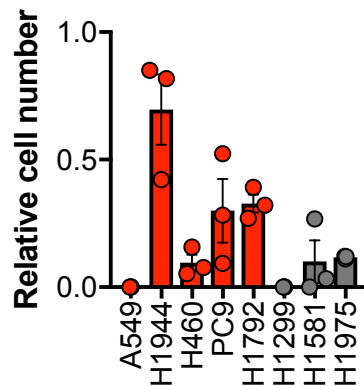**c**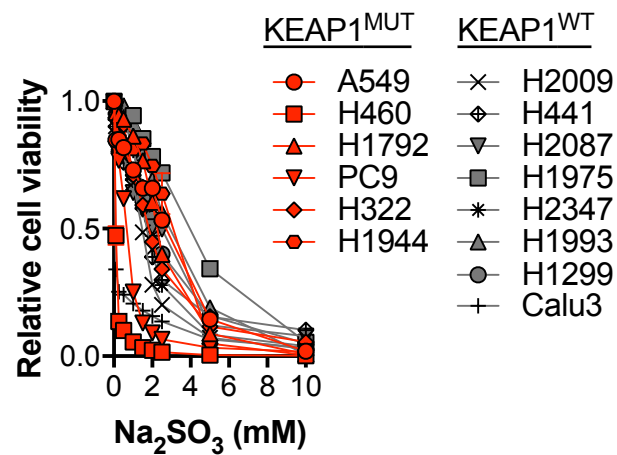**d**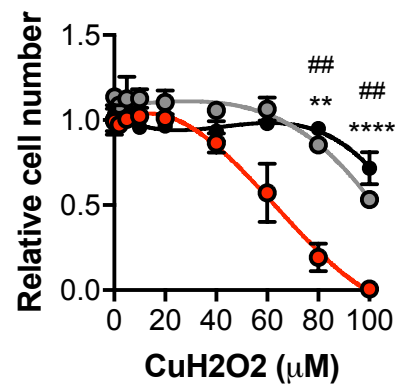**e**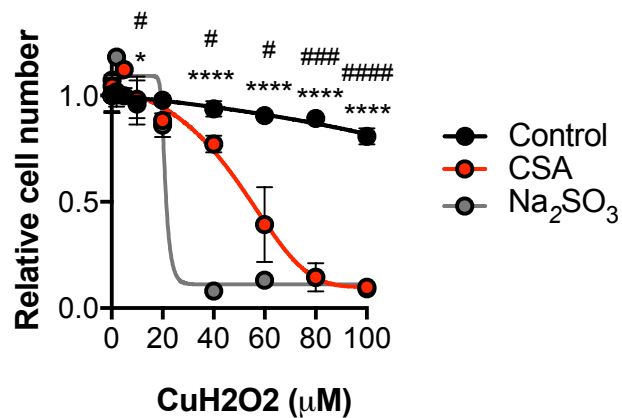

Figure 5 supplement 4

Supplement: supp [file elife_poa_e45572_Figure_5_figure_supplement_4.pdf › elife_poa_e45572_Figure_5_figure_supplement_4.pdf]

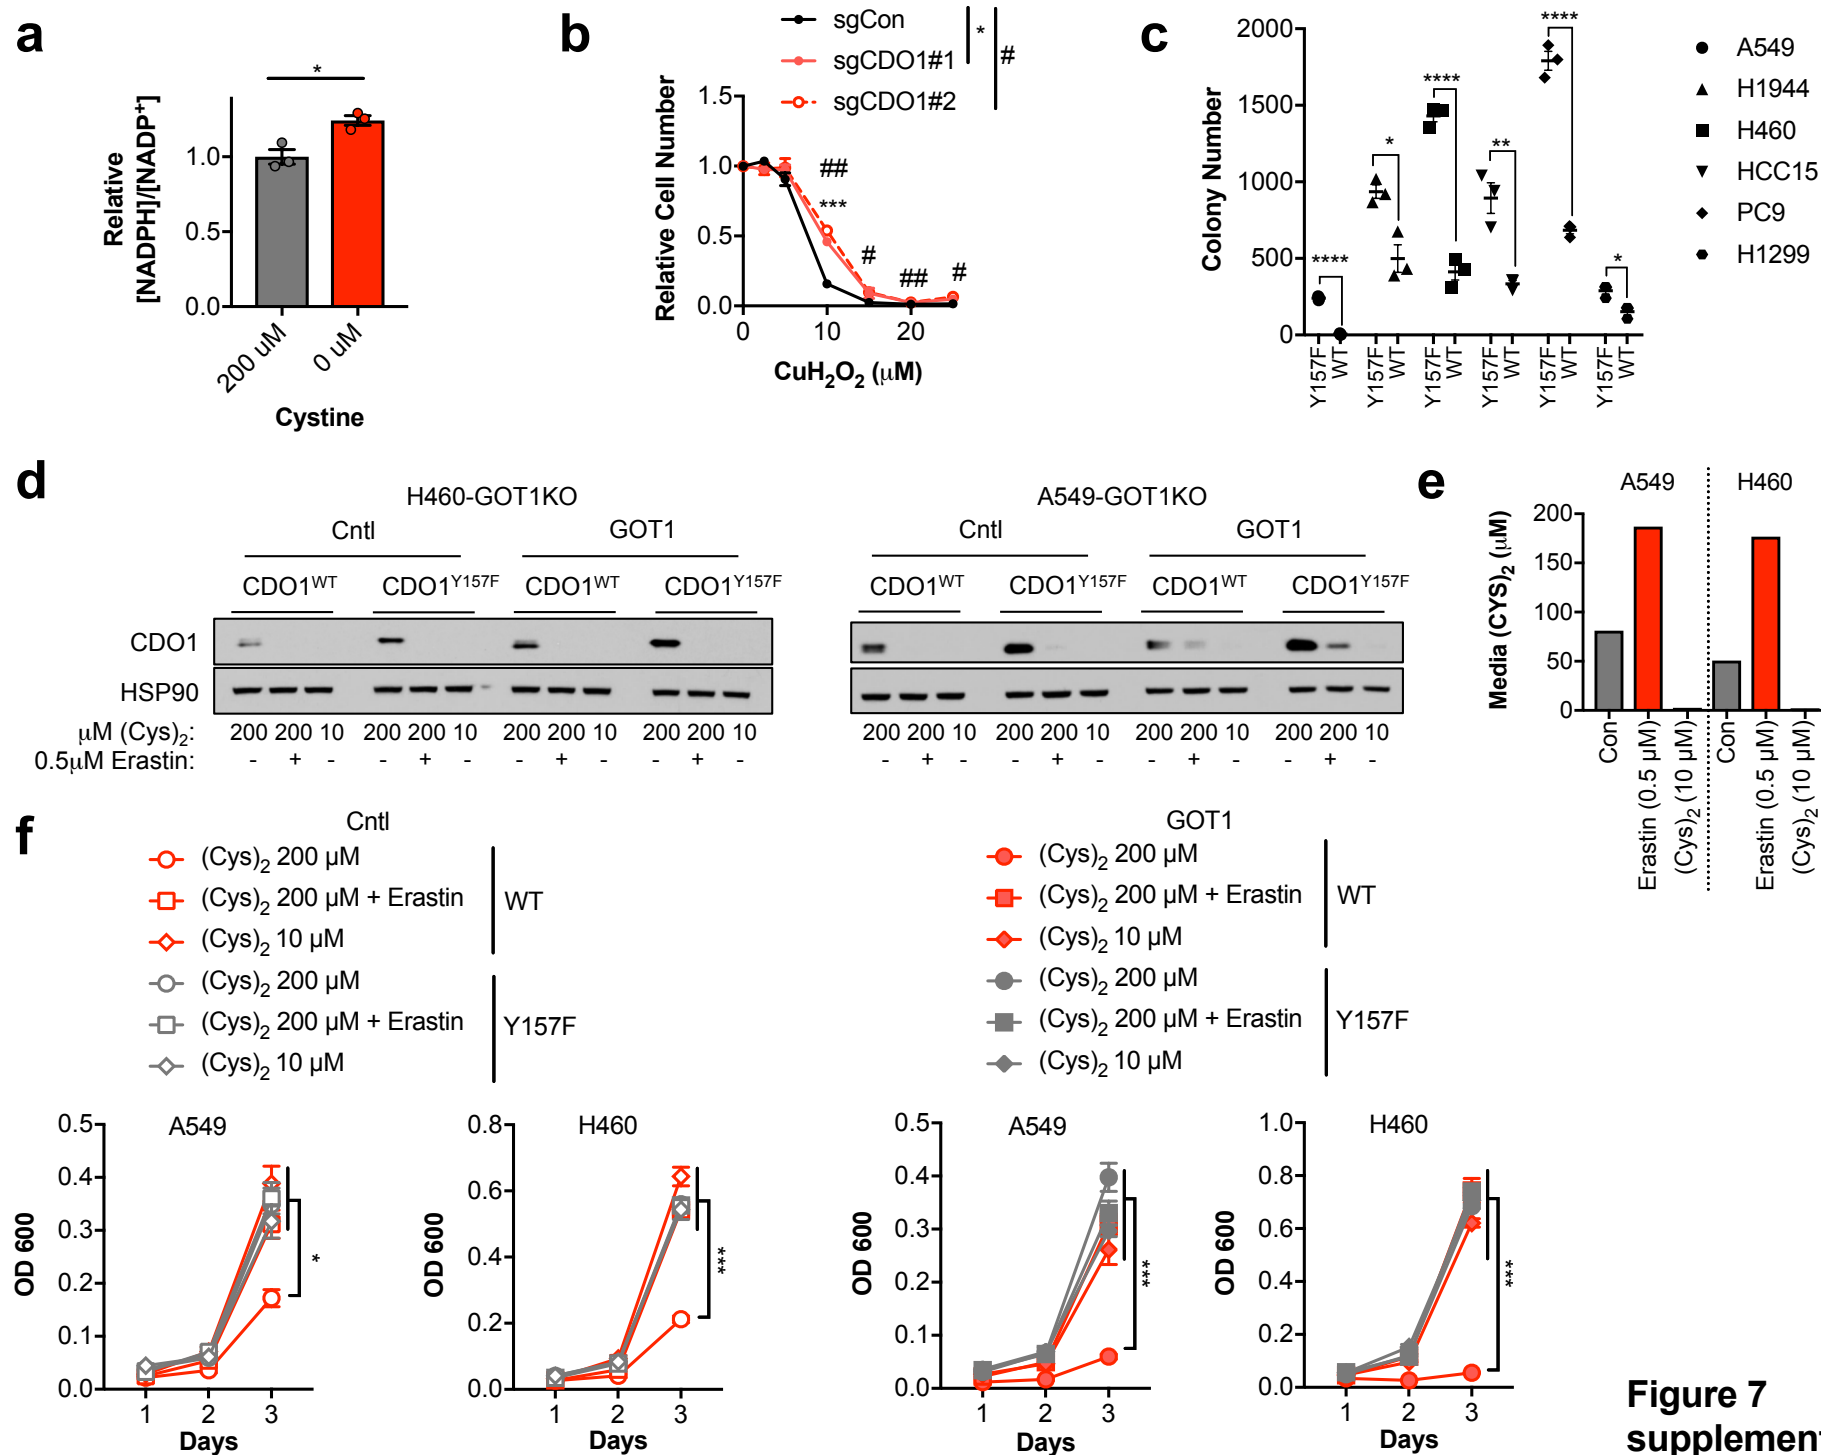

**Figure 7**  
supplement 1

Supplement: supp [file elife_poa_e45572_Figure_7_figure_supplement_1.pdf › elife_poa_e45572_Figure_7_figure_supplement_1.pdf]
